1 **Short title: Using Bayesian networks to association metadata and the vaginal microbiome**

2 **Title: Associations between sexual habits, menstrual hygiene practices, demographics and**  
3 **the vaginal microbiome as revealed by Bayesian network analysis**

4 Noelle Noyes<sup>1</sup>, Kyu-Chul Cho<sup>2</sup>, Jacques Ravel<sup>3</sup>, Larry J. Forney<sup>4</sup>, Zaid Abdo<sup>1\*</sup>

5 <sup>1</sup> Department of Microbiology, Immunology and Pathology, Colorado State University, Fort  
6 Collins, Colorado 80523, USA

7  
8 <sup>2</sup> Department of Statistics, University of Idaho, Moscow, Idaho 83844. Current Address: Naver  
9 Corporation, Jeong-ja-dong 178-1, Bundang-gu, Seongnam-si, Gyeonggi-do, South Korea

10  
11 <sup>3</sup> Institute for Genome Sciences, University of Maryland School of Medicine, Baltimore  
12 Maryland 21201, USA

13  
14 <sup>4</sup> Department of Biological Sciences, University of Idaho, Moscow, Idaho 83844, USA

15  
16 \* Corresponding author

17  
18 E-mail: [zaid.abdo@colostate.edu](mailto:zaid.abdo@colostate.edu)

19

## 20 **Abstract**

21 The vaginal microbiome plays an influential role in several disease states in reproductive age  
22 women, including bacterial vaginosis (BV). While demographic characteristics are associated  
23 with differences in vaginal microbiome community structure, little is known about the influence  
24 of sexual and hygiene habits. Furthermore, associations between the vaginal microbiome and risk  
25 symptoms of bacterial vaginosis have not been fully elucidated. Using Bayesian network (BN)  
26 analysis of 16S rRNA gene sequence results, demographic and extensive questionnaire data, we  
27 describe both novel and previously documented associations between habits of women and their  
28 vaginal microbiome. The BN analysis approach shows promise in uncovering complex  
29 associations between disparate data types. Our findings based on this approach support published  
30 associations between specific microbiome members (e.g., *Eggerthella*, *Gardnerella*, *Dialister*,

31 *Sneathia* and *Ruminococcaceae*), the Nugent score (a BV diagnostic) and vaginal pH (a risk  
32 symptom of BV). Additionally, we found that several microbiome members were directly  
33 connected to other risk symptoms of BV (such as vaginal discharge, odor, itch, irritation, and  
34 yeast infection) including *L. jensenii*, *Corynebacteria*, and *Proteobacteria*. No direct  
35 connections were found between the Nugent Score and risk symptoms of BV other than pH,  
36 indicating that the Nugent Score may not be the most useful criteria for assessment of clinical  
37 BV. We also found that demographics (i.e., age, ethnicity, previous pregnancy) were associated  
38 with the presence/absence of specific vaginal microbes. The resulting BN revealed several as-yet  
39 undocumented associations between birth control usage, menstrual hygiene practices and  
40 specific microbiome members. Many of these complex relationships were not identified using  
41 common analytical methods, i.e., ordination and PERMANOVA. While these associations  
42 require confirmatory follow-up study, our findings strongly suggest that future studies of the  
43 vaginal microbiome and vaginal pathologies should include detailed surveys of participants'  
44 sanitary, sexual and birth control habits, as these can act as confounders in the relationship  
45 between the microbiome and disease. Although the BN approach is powerful in revealing  
46 complex associations within multidimensional datasets, the need in some cases to discretize the  
47 data for use in BN analysis can result in loss of information. Future research is required to  
48 alleviate such limitations in constructing BN networks. Large sample sizes are also required in  
49 order to allow for the incorporation of a large number of variables (nodes) into the BN,  
50 particularly when studying associations between metadata and the microbiome. We believe that  
51 this approach is of great value, complementing other methods, to further our understanding of  
52 complex associations characteristic of microbiome research.  
53

## 54 **Introduction**

55 The microbiome plays a critical role in human health, and the vaginal microbiome has been  
56 linked to urogenital diseases of reproductive age women, including bacterial vaginosis (BV) (1–  
57 3). BV affects nearly one-third of women in the United States (4) and has been implicated in  
58 poorer pregnancy outcomes, acquisition of sexually-transmitted infections and other vaginal  
59 disorders (5,6). Specific changes in the vaginal microflora are associated with BV, including a  
60 depletion of *Lactobacillus* species and an increased abundance of strictly anaerobic bacteria (7).  
61 However, no single bacterial taxon has been shown to cause BV and the condition can be found  
62 in women with widely varying vaginal microbiomes (8–11). BV is characterized clinically by  
63 itching, pain, burning, odor and/or discharge, and is often diagnosed based on a combination of  
64 symptoms, vaginal pH and cytological findings (12). BV is also diagnosed using the Nugent  
65 score, which is the most commonly used diagnostic test for BV within the research community  
66 (13).

67  
68 Just as the microbial underpinnings of BV are complex and varied (14), so too are the influences  
69 of a woman's sexual, sanitary and other practices. A wide range of factors have been shown to  
70 increase BV risk, including smoking, douching, menstruation, and new sexual partners (15–18).  
71 Different ethnic groups exhibit varying rates of BV, leading to conclusions that intrinsic host  
72 factors may contribute to the condition (4), although the effect of confounders on this association  
73 has been questioned (19). Further complicating this picture is evidence that women from  
74 different ethnic groups tend to harbor different vaginal microflora, independent of BV status  
75 (8,20).

76

77 BV is therefore a multifactorial disease mediated by a complex interplay of host, microbial and  
78 environmental factors. Fortunately, all three of these influences can be measured and evaluated  
79 using a combination of 16S rRNA gene sequencing of vaginal samples and detailed  
80 questionnaires of study participants. However, the analytical methods for identifying associations  
81 between multivariate, often categorical metadata with counts of microbial taxa are either ill-  
82 suited, contested or opaque (21,22). The most widely used analytical method for community-  
83 level data involves ordination of normalized microbiome counts (e.g., principal coordinates  
84 analysis [PCoA] and nonmetric multidimensional scaling [NMDS]) followed by statistical  
85 significance testing of explanatory/metadata variables (e.g., ANOSIM, PERMANOVA).  
86 However, these methods reduce the dimensionality of the microbial community structure to two  
87 or three dimensions, obscuring intra-microbiome interactions. In addition, interactions between  
88 explanatory (metadata) variables are difficult or impossible to uncover because statistical testing  
89 usually occurs on a variable-by-variable basis (23). Therefore, these methods do not allow for  
90 discovery of more nuanced and complex dynamics between and within the microbiome and host  
91 and environmental factors. Identifying such dynamics can be crucial for understanding and thus  
92 combatting multifactorial conditions such as bacterial vaginosis – particularly when such  
93 conditions lack an accurate diagnostic description and/or test (24). Bayesian network (BN)  
94 analysis offers potential advantages in handling mixed datasets for complex conditions, and use  
95 of this approach may help to elucidate some of the nuanced, yet important, associations between  
96 host, environmental and microbial factors in diseases such as BV. For instance, BN's have been  
97 proposed as diagnostic tools for such multifactorial diseases as breast cancer and cardioembolic  
98 stroke (25–27). While the heavy computational burden of building BNs has impeded their  
99 widespread adoption, recent advances in algorithms have removed this barrier (28). In addition,

100 software implementations now offer BN analysis within user-friendly packages (29,30). Finally,  
101 unlike other machine learning approaches, BN's possess an inherently intuitive interpretation and  
102 allow for a wide range of data input types, both continuous and categorical (31).

103

104 The primary goal of this study was to uncover associations between host behavioral  
105 characteristics, vaginal microbiome composition, risk symptoms and diagnostic criteria of BV  
106 utilizing BN's. Using this approach, we have demonstrated associations between women's sexual  
107 and menstrual habits, demographics, vaginal microbiome composition, risk symptoms of BV and  
108 the Nugent Score (a BV diagnostic). Our findings support previously-documented associations  
109 between microbiome members (e.g., *Eggerthella*, *Gardnerella*, *Dialister*, *Sneathia* and  
110 *Ruminococcaceae*), the Nugent Score and vaginal pH (risk symptom) (8,13,32,33). However,  
111 we found no connections between the Nugent Score and other risk symptoms of BV such as  
112 vaginal discharge, itch, irritation, abdominal or pelvic pain, yeast infection and underwear  
113 staining within 60 days prior to sampling and any type of current vaginal odor. This suggests that  
114 the Nugent Score may not provide an accurate diagnostic of BV in some women. Additionally,  
115 we found that several microbiome members were directly connected to risk symptoms of BV,  
116 including *L. jensenii*, *Corynebacteria*, and *Proteobacteria*. Demographics (i.e., age, ethnicity,  
117 previous pregnancy) also influenced the presence/absence of specific vaginal microbes. The  
118 resulting network also revealed several as-yet undocumented associations between birth control  
119 usage, menstrual hygiene practices and microbiome members. These associations require  
120 confirmatory follow-up study, though strongly suggest that future studies of the vaginal  
121 microbiome and vaginal pathologies include detailed surveys of participants' sanitary, sexual and

122 birth control habits, as these can act as confounders in the relationship between the microbiome  
123 and disease.

124

125 Secondary objectives of this study included demonstrating the hypothesis-generating power of  
126 BN's through confirmation of previously described microbiome-BV associations, as well as the  
127 wide accessibility of BN's within a readily available, user-friendly environment. In addition, we  
128 aimed to illustrate the capacity of the BN method to directly associate component taxa of the  
129 microbiome with metadata. This capacity contrasts with common approaches used to analyze  
130 these data types (e.g., PCoA, NMDS and clustering), which rely on reducing the dimensionality  
131 of the total microbial community to two or three dimensions, followed by clustering or  
132 correlation of this reduced community with metadata (such as demographics). The BN approach  
133 also circumvents the limits on the number of interactions that can be tested between metadata  
134 and microbiome members that are imposed by tools such as PERMANOVA (34) or  
135 metagenomeSeq (35). This advantage of the BN approach is especially true when the number of  
136 variables observed in association with the microbiome is large. In such cases, network analysis  
137 identifies the hierarchy of relationships between the various metadata and microbiome taxa (i.e.,  
138 the nodes of the network), and then represents these relationships using the arcs (or edges) of the  
139 network. When possible, we demonstrated these differences by providing direct comparisons of  
140 the BN approach with results obtained from Nonmetric Multidimensional Scaling Ordination  
141 (NMDS)-Analysis of Similarity (ANOSIM) and PERMANOVA. These comparisons should be  
142 interpreted with caution, as particularly the NMDS/ANOSIM approach is limited by the degrees  
143 of freedom available for significance testing and for assessing interactions. In addition -- and

144 unlike the BN approach -- NMDS/ANOSIM and PERMANOVA analyses do not allow for the  
145 possibility of hierarchical relationships between variables observed within the data.  
146 It is important to note that the BN approach presented in this work was aimed at inference, rather  
147 than prediction; and that we focused on evaluating associations within the data that could  
148 indicate possible associations in the target population. Use of the BN approach in this way does  
149 not attempt to classify the state of a new individual within the target population, i.e., prediction.  
150 Hence our network was fitted using all data and we did not attempt to perform cross validation to  
151 assess the ability of the network to predict or classify.

152

## 153 **Materials and Methods**

### 154 **Study Population and Sampling**

155 Questionnaire responses (see S1 File) and the relative abundance of 16S rRNA gene sequences  
156 (see S1 File) were obtained from a study of 396 healthy, sexually active, non-pregnant women of  
157 reproductive age (range 12-45 years); details of the study population have been described  
158 previously (8). Briefly, study participants submitted 2 self-collected vaginal swabs; one swab  
159 was used for 16S sequencing and the other was used to obtain a Nugent score, which is one of  
160 several diagnostic assays for BV and is the most commonly used within the research community  
161 (13). High Nugent scores are considered to be diagnostic of BV. Since all study participants  
162 were considered to be healthy, those with high Nugent scores were assumed to have  
163 asymptomatic BV. At the same time as vaginal swab collection, study participants were

164 administered a detailed questionnaire on their sexual and sanitary habits and health histories (8,  
165 S2 File).

## 166 **Ethics Statement**

167 The institutional review boards at Emory University School of Medicine, Grady Memorial  
168 Hospital and the University of Maryland School of Medicine approved the protocol. Guidelines  
169 of the universities were followed in the conduct of the clinical research. Participants provided  
170 written informed consent to participate in the study and written informed consent for use of the  
171 data for future studies. The study was registered at [clinicaltrials.gov](https://clinicaltrials.gov) under ID NCT00576797.

## 172 **Data Preparation**

173 Several filtering steps were taken with the goal of retaining only those variables (i.e., taxa,  
174 survey responses and demographic information) that would provide robust information during  
175 BN construction. In order to reach this goal, we removed taxa and survey response variables that  
176 were sparsely represented within the dataset, as described below.

177 Ribosomal 16S sequencing data were processed using the Ribosomal Database Project (RDP)  
178 Classifier (36) as described previously (8). In order to allow for robust BN construction, we  
179 removed samples that contained <1,000 16S counts. In addition, subjects who were not in overall  
180 general health or who had experienced toxic shock syndrome were removed from analysis. 16S  
181 counts were then normalized to the sample with the lowest number of counts, and taxa with  
182 counts <0.1% of total 16S counts were removed from further analysis to provide robust inputs  
183 into BN analysis. Finally, 16S counts were converted into presence/absence (i.e., 0/1) data (S3



184 File). While the implementation of BN analysis used in this study, i.e., bnlearn (29), is able to  
185 incorporate continuous variables with a Gaussian distribution, unfortunately the sparseness and  
186 skewness of the 16S rRNA count distributions in this dataset were such that we could not justify  
187 using abundances without dichotimization (see abundance distributions of used taxa in S8 File).  
188 Furthermore, categorizing these distributions to include more than presence/absence categories  
189 would have inflated the number of parameters that needed to be estimated, resulting in  
190 diminished stability of the BN network given the available sample size.

191 From the survey data, we removed questions that were related solely to study design factors  
192 (e.g., enrollment information, location of survey administration, survey administrator ID). Binary  
193 questions about specific vaginal odors (i.e., fishy, musty, foul and other) were collapsed into a  
194 single, binary "any odor" variable in order to decrease sparseness. In addition, we dropped  
195 questions about past birth control use in order to focus on current birth control habits, which we  
196 hypothesized would exhibit a stronger effect on the vaginal microbiome. Survey questions for  
197 which >5% of respondents did not provide an answer were excluded from BN analysis so that  
198 variables with a significant proportion of missing data did not exert undue influence over the  
199 graph. For the same reason, and after this variable-level exclusion, we removed any participants  
200 with missing data, keeping only those subjects with complete data in conjunction with the  
201 variables under study. After these filtering steps, we discretized any remaining continuous  
202 variables. Respondents' ages were converted from a continuous into a categorical variable with 3  
203 levels: less than or equal to 30 (young adults), 31 – 40, and greater than 40 years of age (close to  
204 menopause). Nugent scores were categorized into low (0-3), medium (4-6) and high (7-10). Age  
205 at menstrual onset was discretized into <11, 11-15 and >15 years, and number of sexual partners  
206 in the last 60 days was categorized into 0, 1 and >1. Number of vaginal births and duration of

207 menstruation were treated as categorical variables with 4 levels each (0 – 3 births and 1 – 4 days,  
208 respectively). Finally, we excluded survey questions with sparse outcomes, defined as having  
209 <5% of respondents within any one outcome level (i.e., for binary questions, at least 5% of  
210 respondents had to be in the "yes" and "no" outcome levels). This was also done such that stable  
211 BN's could be constructed. The resulting data are presented in S3 File and a key is available from  
212 S4 File.

### 213 **BN Construction**

214 Filtered, dichotomized 16S rRNA gene counts as well as filtered and discretized demographic  
215 and survey responses were provided as input to BN construction, which was performed using  
216 bnlearn (29) implemented within the statistical software R (37). Age and ethnicity were  
217 specified as roots of the network, and Nugent score was specified as a leaf. Directionality  
218 between all other nodes was not specified in order to allow for the complex, likely  
219 multidirectional interplay between the microbiome, host factors, vaginal microenvironment and  
220 risk symptoms that might be associated with BV (12,14,38). The hill-climbing algorithm was  
221 used for BN construction with scoring based on the logarithm of the Bayesian Dirichlet  
222 equivalence (BDe) score; an optimal imaginary sample size was estimated using the alpha.star  
223 function in bnlearn (29,39). To obtain a consensus network, 1,000,000 BN's were constructed by  
224 first generating 1,000 random number seeds and, then, generating 1000 bootstraps of the input  
225 data. The aim of varying the seeds was to alleviate the possibility of being stuck in a local  
226 optimum in the space of all possible networks. The 1000 bootstraps per different starting point  
227 were used to assess stability of the network given each starting point. All 1,000,000 networks  
228 were then combined to construct a consensus BN by first using the mean function to pool the

229 bootstrapped networks and then by using the averaged.network function to construct the  
230 consensus. Both of these functions are part of the bnlearn package. The empirical frequency for  
231 every arc within all BN's was determined, and arcs that met an empirical threshold frequency of  
232 0.30 or more were used to produce the consensus BN. Network analysis and inference was  
233 performed using both this threshold and a 0.50 majority rule threshold. The resulting DAG was  
234 used in maximum likelihood estimation parameter fitting through the bn.fit function, as well as  
235 network analysis (29).

## 236 **BN Analysis**

237 Prior to BN analysis, nodes were categorized as either “demographic”, “microbiome”,  
238 “sexual/sanitary habit”, “BV risk symptom”, or “BV diagnostic criteria” (S4 File). Variables  
239 that were categorized as BV risk symptoms included “staining of underwear”, “vaginal  
240 discharge”, “vaginal odor”, “vaginal itch”, “vaginal irritation”, “abdominal or pelvic pain” and  
241 “yeast infection” within the past 60 days prior to sampling, and pH and any type of current  
242 vaginal odor (any odor). These variables were chosen based on previously observed  
243 associations with increased risk of BV (6,12,40). Vaginal pH, vaginal discharge and staining,  
244 and odor could be thought of as proxies for the Amsel symptoms used in BV diagnosis in clinical  
245 settings (32). Given that all included subjects were considered healthy at the time of this study,  
246 our intention was to highlight possible increased risk of BV due to presence of these risk  
247 symptoms. The Nugent Score was the only variable designated as a “BV diagnostic criteria”.  
248 After *a priori* categorization, the nodes and edges obtained from bnlearn were used to conduct  
249 network analysis in order to understand the structure of the overall network, as well as the  
250 connections within it. Average Markov blanket size and overall graph characteristics were

251 calculated and reported. Network density was defined as the proportion of all possible edges that  
252 occurred in the final network. Node degree was defined as the number of incoming and outgoing  
253 edges, node closeness centrality was defined as the average shortest path from a node to all other  
254 nodes, and node betweenness centrality was defined as the frequency with which a node was  
255 included in the shortest path between nodes in the network. Node closeness and betweenness  
256 centralities were normalized for comparison purposes. Groupings of nodes (i.e., groupings not  
257 related to the *a priori* node category, but rather agnostic groupings) were detected using a  
258 modularity optimizing algorithm (41) as implemented in Gephi (42), using a resolution of 1.0  
259 and randomization without edge weights. Networks were visualized using Gephi (42), using the  
260 Force Atlas layout unless otherwise specified.

## 261 **Ordination and Clustering**

262 Filtered, normalized, non-dichotomized, Hellinger-transformed (43) 16S rRNA gene counts were  
263 used to construct a Euclidean distance matrix, which was then ordinated using NMDS with  
264 multiple random starts and two dimensions (44). Use of two dimensions resulted in a stress value  
265 of 0.19, indicating less-than-ideal fit; however, increasing the number of dimensions resulted in  
266 failure of convergence, and therefore a better fit could not be achieved. Associations between the  
267 ordinated microbiome and metadata variables (i.e., host demographics and survey data) were  
268 tested using analysis of similarities (ANOSIM) (45). A *P*-value of less than 0.05 was considered  
269 statistically significant.

## 270 **PERMANOVA**

271 Permutation based multivariate analysis of variance (PERMANOVA) was also used to assess the  
272 influence of metadata on the vaginal microbiome. The process of assessing significance of  
273 association followed a forward elimination, stepwise model selection approach based on  
274 Akaike's Information Criteria (AIC) and using the step function as implemented in R.  
275 PERMANOVA was performed on Hellinger-transformed microbiome counts. All survey and  
276 demographic response variables that passed the stepwise selection criteria (see above) and  
277 minimized the AIC score were included in the final PERMANOVA model (implemented using  
278 rda function in vegan). A permutation test using 1000 permutations was used to compute *P*-  
279 values to assess significance of associations between the metadata and the observed microbiome.

280

## 281 **Results and Discussion**

### 282 **Data filtering and descriptive statistics**

283 Of the 396 participants included in the original study, 2 were removed *a priori* due to a lack of  
284 any metadata from the questionnaire. Among the remaining 394 participants, 247 genus- and  
285 species-level taxa were identified through 16S sequencing of vaginal swabs. Total 16S counts  
286 per sample ranged from 693 to 7,392 with a median of 2,149. Five samples with <1,000 total 16S  
287 counts were removed from the analysis, for a remaining 389 samples; all 247 taxa were  
288 represented within these 389 samples. 16S counts were normalized to a count of 1,006, which  
289 was the total number of 16S reads in the sample with the lowest total count. The distribution of  
290 16S counts was strongly right-skewed, and therefore 220 taxa were present at <0.1% abundance

291 (i.e., fewer than an average of 2 reads per sample) and were removed from further analysis.

292 From the 389 study participants with 16S data that passed filtering, a further 4 participants were

293 removed because they answered "no" or did not answer the question of whether they were in

294 overall good health; and a further 9 were removed because they either answered "yes" to

295 previous toxic shock syndrome or did not answer this question. A further 91 respondents were

296 excluded from analysis due to missing data for survey questions. The decision to remove

297 subjects with missing data was not made lightly and was based on two reasons: 1) data

298 imputation, although useful, could be faulty or could reduce the variability of the estimates of the

299 network parameters (46) resulting in overconfidence in the network and 2) adding the missing

300 data as a category by itself would substantially hamper interpretability of results. Accordingly,

301 the decision was made to err on the conservative side (i.e., increased variability), rather than on

302 the side of overconfidence or weak interpretability. This left a total of 285 healthy study

303 participants for inclusion in BN analysis, encompassing a total of 27 taxa with a median

304 prevalence of 89/285 samples (31%, range 24 - 228 out of 285 samples, S3 File). Among the

305 285 participants included in the network, 58 self-reported to be Hispanic (20.4%), 71 Asian

306 (24.9%), 78 White (27.4%) and 78 African-American (27.4%). Nearly half of respondents were

307 age 30 or under (49.5%, 141/285), and only 25 reported being over age 40 (8.8%).

308 After removing study-specific questions, redundant questions, past birth control use questions,

309 questions about frequency of sexual habits and menstrual hygiene, as well as questions related to

310 study exclusion criteria, a total of 263 survey questions were included in the initial survey

311 response data. After removing questions with >5% missing responses, we were left with 56

312 study questions. A further 27 questions were removed due to sparseness, resulting in a total of 29

313 study questions available for input into the BN (S3 File). A majority of the 285 survey

314 respondents included in the Bayesian network reported having been pregnant at least once  
315 (170/285, 59.6%). Sixty-three reported having had no sex partners in the 60 days preceding  
316 sampling (22.1%), a further 199 were monogamous in this same time period (69.8%), and 23  
317 respondents had multiple sex partners (8.1%). The majority of women reported an absence of  
318 vaginal itching, irritation, discharge, odor or uro-abdominal pain in the 60 days preceding the  
319 survey (177/285, 62.1%). Vaginal yeast infections in the 60 days preceding sampling were  
320 reported by 19 of the 285 respondents. In addition to the 29 survey questions, we also had data  
321 on the vaginal pH and Nugent score of the 285 women in the study. The majority of participants  
322 had a low Nugent score (188/285, 66.0%), while a smaller proportion were categorized as  
323 intermediate and high (34/285 and 63/285, 11.9% and 22.1%, respectively). Around half of the  
324 285 women had a vaginal pH of less than or equal to 4.5 (152/285, 53.3%), while about half had  
325 a higher vaginal pH (133/285, 46.7%).

## 326 **Network construction**

327 A total of 60 variables were included in BN construction: the 29 survey response variables and  
328 27 bacterial taxa that passed filtering criteria, as well as age, ethnicity, vaginal pH and Nugent  
329 score. The consensus BN had 152 directed edges with an average Markov blanket size of 9.4.

## 330 **BN Characteristics**

331 The final consensus graph contained 60 nodes within a single sparse network with a density of  
332 0.043. The majority of nodes contained between 1 and 6 connections, while several were more  
333 highly connected (Fig. 1). *Eggerthella* represented the most highly-connected node with 11  
334 edges, followed by *Sneathia*, previous pregnancy status and current use of any type of birth  
335 control with 10 edges each.

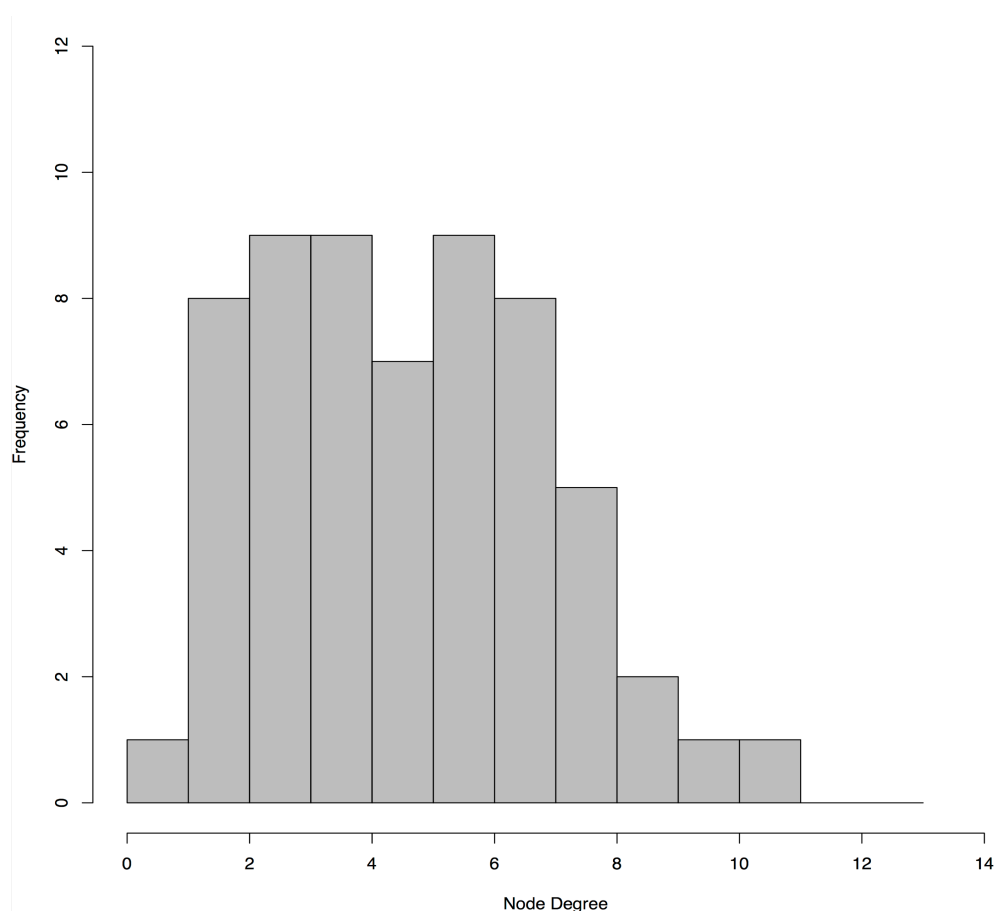

336 **Figure 1. Histogram of node degree for the final BN.** The majority of nodes had fewer than 8  
337 connections (i.e., degrees), while a few were more highly connected.

338 Betweenness centrality measures indicated that *Parvimonas*, report of vaginal odor in the 60  
339 days prior to the survey, as well as presence/absence of *L. vaginalis* within the vaginal  
340 microbiome, were situated along highly-connected paths in the network [S4 File, see column



341 “Betweenness Centrality”]. Node closeness centrality metrics suggested that presence/absence  
342 of *Lactobacillus iners*, *Mycoplasmataceae*, *Lachnospiraceae* and *Streptococcus* were all nodes at  
343 the geographic center of the network, along with vaginal irritation in the 60 days preceding the  
344 survey [S4 File, see column “Closeness Centrality”]. Interestingly, *Sneathia*, *Eggerthella*,  
345 *Parvimonas* and *Streptococcus* have been described as key members of a vaginal microbiome  
346 characterized by a diversity of non-*Lactobacillus* bacteria found more commonly in black and  
347 Hispanic women (8,47). The fact that these bacteria are centrally situated in the BN developed in  
348 this study (as defined by closeness, betweenness and degree metrics) lends support to the idea  
349 that these bacteria could play an important role in differentiating the vaginal microbiome in  
350 different women.

## 351 **Ordination, Clustering and PERMANOVA**

352 Univariable clustering analysis with ANOSIM significance testing revealed that six of the 33  
353 metadata variables (including host demographics and survey responses) were statistically  
354 significantly associated with the microbiome ordination results. This list comprised ethnicity,  
355 vaginal pH, Nugent score, tampon use, as well as previous pregnancy and vaginal birth statuses  
356 [S5 File]. S6 File provides the associated NMDS plots for these six variables. These analyses  
357 suggested that demographic and behavioral traits of participants were associated with differences  
358 in the microbiome; however, given the nature of these analyses, it was unclear specifically which  
359 microbiome members were being affected, and whether such associations were direct or indirect.  
360 PERMANOVA analysis, alternatively, revealed a best-fit model that also included vaginal pH,  
361 Nugent score and previous pregnancy, as well as participant age, use of pads during  
362 menstruation, staining of underwear in the previous 60 days, and use of male condoms as current

363 birth control method, which together explained 25% of the variability in the data (Table 1). This  
364 type of analysis provided more information highlighting associations between high Nugent  
365 Score, *Sneathia* and *Megasphaera* and possibly *Atopobium*, *Dialister*, *Eggerthella*,  
366 *Ruminococcaceae*, and *Lachnospiraceae* (S7 Figure). It also showed putative association  
367 between intermediate Nugent Score and *L. gasseri* (S7 Figure). Other relationships were tenuous  
368 and not clearly defined. Furthermore, the above analyses precluded the testing of more  
369 complicated interactions between multiple variables of diverse types. BN analysis was thus used  
370 to identify such relationships within all of the data, including between individual microbiome  
371 members; we point to the results of NMDS/ANOSIM and PERMANOVA where relevant.

## 372 **Associations between population demographics, the microbiome and** 373 **survey responses**

374 There were 58 edges that bridged nodes of different types, i.e., demographics, sexual and  
375 menstrual hygiene habits, risk symptoms of BV, diagnostic criteria and microbiome (see S4 File  
376 for *a priori* classification of nodes); compared to 94 edges that connected nodes of like types. Of  
377 these 58 bridging edges, 16 were identified in 50% of the bootstrapped BN networks (Fig. 2).  
378 Many of these connections confirmed previously documented relationships between  
379 demographic factors and sexual and menstrual habits. For instance, ethnicity was directly related  
380 to Pap testing status, with Asian women exhibiting a much higher likelihood of never having had  
381 a pap smear compared to Hispanic, White and Black respondents (20.8% versus 4.6%, 2.9%, and  
382 1.2%, respectively), a disparity that has been described previously (48,49). At a threshold of at  
383 least 50% bootstrap support, ethnicity also influenced tampon and pad use during menstruation

384 (50), while at 30% support ethnicity was associated with age at menstrual onset (51,52) and the  
385 likelihood of a woman ever having self-treated a vaginal infection.

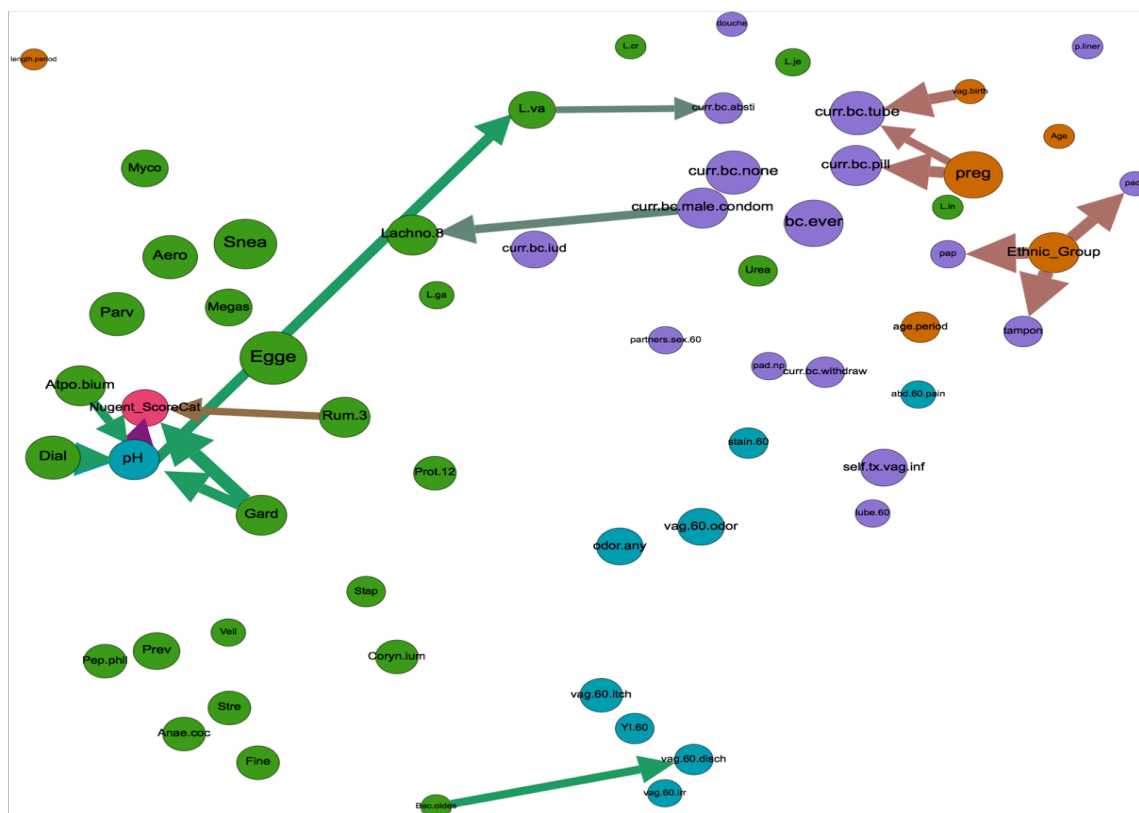

386  
387 **Figure 2. Inter-category bridging edges with >50% bootstrap.** Network displaying all nodes,  
388 but depicting only inter-category bridging edges with >50% bootstrap support (arrows). Node  
389 size is proportional to closeness centrality, arrow thickness is proportional to bootstrap support,  
390 and node color signifies category type (orange = demographic, green = microbiome, turquoise =  
391 BV risk symptom, purple = sexual/menstrual habits, and pink = diagnostic criteria of BV). Node  
392 label abbreviations and categorization by type can be found in S4 File.

393 At 50% bootstrap support, there were no edges between demographic variables (i.e., age,  
394 ethnicity, age at menstrual onset, previous pregnancy and vaginal birth) and microbiome nodes  
395 (Fig. 2), suggesting that these factors may not exert robust influence over the presence of  
396 common microbiome members. However, decreasing bootstrap support to 30% revealed four  
397 such edges, namely associations between participant age and *Lactobacillus iners*, ethnicity and  
398 *Eggerthella*, age at menstrual onset and *Ureaplasma*, and *Mycoplasmataceae* and period length  
399 (Fig. 3). PERMANOVA testing supported the associations between the vaginal microbiome and  
400 age, while NMDS/ANOSIM analysis supported the association between the microbiome and  
401 ethnicity and marginally (ANOSIM  $P = 0.06$ ) between the microbiome and age at menarche  
402 (Table 1, S5-S7 Files). Additionally, PERMANOVA and NMDS/ANOSIM analyses revealed  
403 associations between the vaginal microbiome and previous pregnancy and/or previous live birth  
404 (Table 1, S5-S7 Files). Given the constraints of PERMANOVA and NMDS/ANOSIM analysis,  
405 we were unable to identify which specific microbiome members may be involved in these  
406 associations.

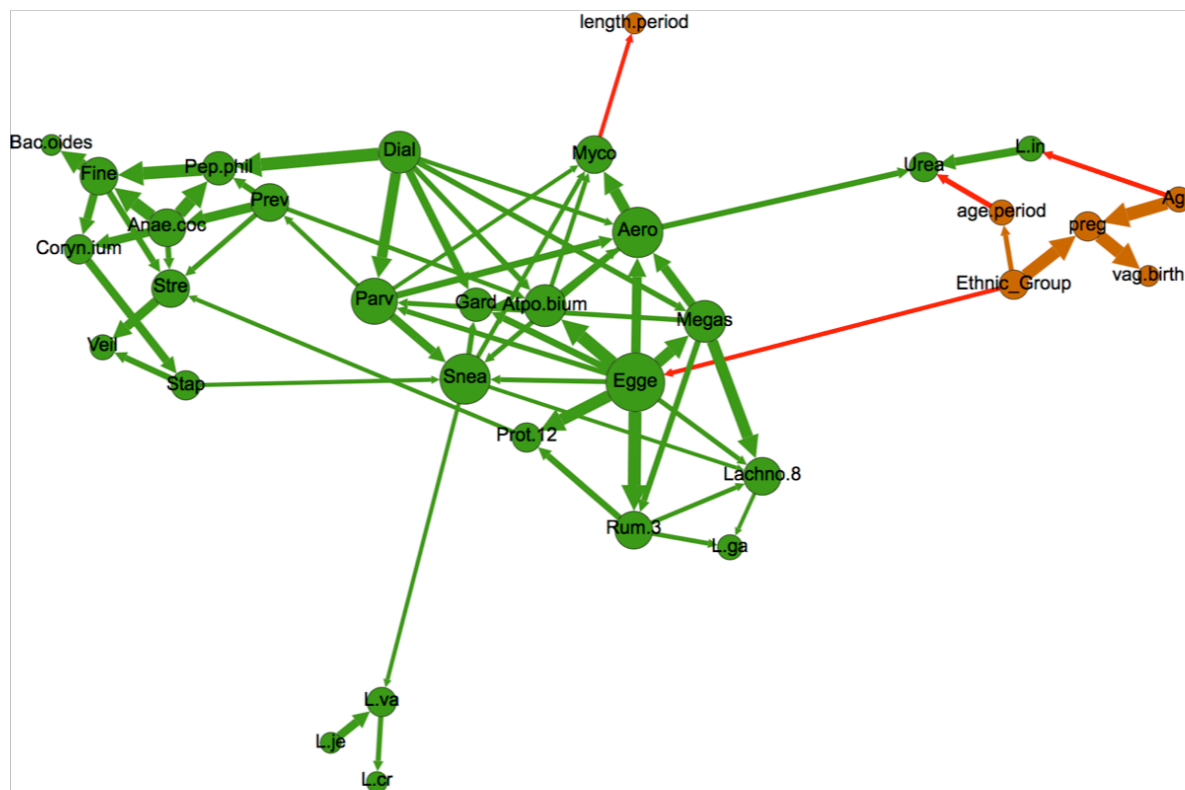

408 **Figure 3. Network depicting nodes related to demographics (orange) and microbial taxa**  
409 **(green), as well as all edges with at least 30% bootstrap support.** Node size is proportional to  
410 node degree (i.e., number of incoming and outgoing edges). Arrow thickness is proportional to  
411 bootstrap support. Red arrows bridge demographic and microbiome nodes, while green and  
412 orange arrows connect nodes of the same type (i.e., microbiome-to-microbiome or demographic-  
413 to-demographic). Node label abbreviations can be found in S4 File.

414 However, BN analysis revealed that the probability of harboring *L. iners* given age >40 years  
415 was 93%, compared to 72% and 85% for women ages 30-40 and <30 years, respectively. To  
416 date, longitudinal studies of the vaginal microbiome have been restricted to relatively short time  
417 periods, with subsequently little knowledge about how the microbiome may change with age.  
418 However, studies suggest that variations in estrogen levels influence presence/abundance of

419 *Lactobacilli* (53,54), and age has a significant influence on estrogen levels (55), which together  
420 present a possible mechanism for the association we found between age and *L. iners*. Existence  
421 of an edge between these two nodes suggests significance of association (affirmed by a Chi-  
422 square test-of-independence, p-value 0.0067). BN analysis also revealed a complex relationship  
423 between age and other demographic variables. Age was associated with previous pregnancy  
424 status (which can also affect estrogen levels), as was ethnicity; indeed, previous pregnancy was a  
425 common effect of age and ethnicity within this dataset (i.e., the three nodes formed a v-structure  
426 within the graph). Only 24% of white respondents reported having ever been pregnant (19/78),  
427 compared to 58%, 77% and 86% of Asians, African-Americans and Hispanics, respectively. The  
428 role of age in likelihood of previous pregnancy was very strong among Asian and white  
429 respondents, and less so for African-Americans and Hispanics. Ethnicity also influenced the  
430 likelihood of identifying *Eggerthella* within the microbiome, as African-Americans were more  
431 likely to harbor this bacterium (45.4% versus 18.8%, 16.5% and 3.8% for Hispanics, Caucasians  
432 and Asians, respectively). Interestingly, *Eggerthella* was one of 28 taxa that were previously  
433 found to exhibit a significant interaction with race and BV status (47), and was also a key  
434 member of a certain vaginal microbiome composition that was more commonly found in black  
435 and Hispanic women than white and Asian women (8). Finally, previous pregnancy decreased  
436 the likelihood of a woman harboring *L. crispatus* and age at menarch was associated with  
437 *Ureaplasma* presence. *Ureaplasma* presence was also influenced by pap smear status.  
438 *Ureaplasma* in the upper genital tract has been associated with poor pregnancy outcomes, and  
439 *Ureaplasma* colonization in the lower genital tract has been found to be associated with a variety  
440 of socioeconomic and demographic factors including educational, income, ethnicity and marital  
441 status (56–58). Interestingly, age at menarch has also been associated with socioeconomic-

442 related factors such as body mass index (BMI) and ethnicity (59,60), as has pap smear status  
443 (48,49). Results such as these demonstrate the complexity of interactions between microbiome  
444 composition and demographic and behavioral factors, and strongly suggest that any attempts to  
445 associate microbial composition with clinical BV should include co-analysis of potential  
446 confounders. The results presented here indicate that age, ethnicity and previous pregnancy  
447 status could potentially be used as portmanteau variables for such confounders.

448 Upon modularity analysis, nodes within the network tended to segregate into groupings of nodes  
449 of like type (called “communities” in network analysis), with some exceptions (Fig. 4). Nearly  
450 all of the microbiome nodes fell into two largely bacteria-specific groupings, one of which  
451 contained the nodes for Nugent score and vaginal pH. All of the *Lactobacilli* except *L. gasseri*  
452 segregated along with nodes related to demographics (including study participant age, ethnicity,  
453 pap smear status, age at menstrual onset and previous pregnancy), menstrual hygiene habits and  
454 douching. All of the nodes related to risk symptoms associated with increased risk of BV, except  
455 for pH, fell into one grouping that also included use of the withdrawal method for birth control,  
456 and all of the other birth control variables were clustered into a fifth grouping that also included  
457 the number of sexual partners in the previous 60 days (Fig. 4).

458 These modularity-based grouping results highlight the dissociation of the Nugent score (a BV  
459 diagnostic) and vaginal pH from all other risk symptoms of BV, a finding which supports recent  
460 studies suggesting that these may not be the most useful criteria for assessment of clinical BV  
461 disease (8,33). None of the other risk symptom-based nodes fell into the same modularity  
462 grouping as the Nugent score and vaginal pH, and indeed the BN contained no directed paths of  
463 any length between vaginal pH or Nugent score and risk symptoms of vaginal irritation, itch,

464 odor, pain or staining. Furthermore, contingency table propagation showed that women  
465 reporting vaginal odor, itch and irritation had an 11.6% chance of a high Nugent score, compared  
466 to 11.0% for women who did not report vaginal odor, itch and irritation, again suggesting that  
467 the Nugent score might not be reliably associated with these risk symptoms. In addition, while  
468 bacteria traditionally thought to be determinants of the Nugent score did belong to the same  
469 modularity grouping as the node for Nugent score (e.g., *Dialister* and *Gardnerella*), these  
470 bacteria were not associated with BV risk symptoms other than pH (Fig. 4).

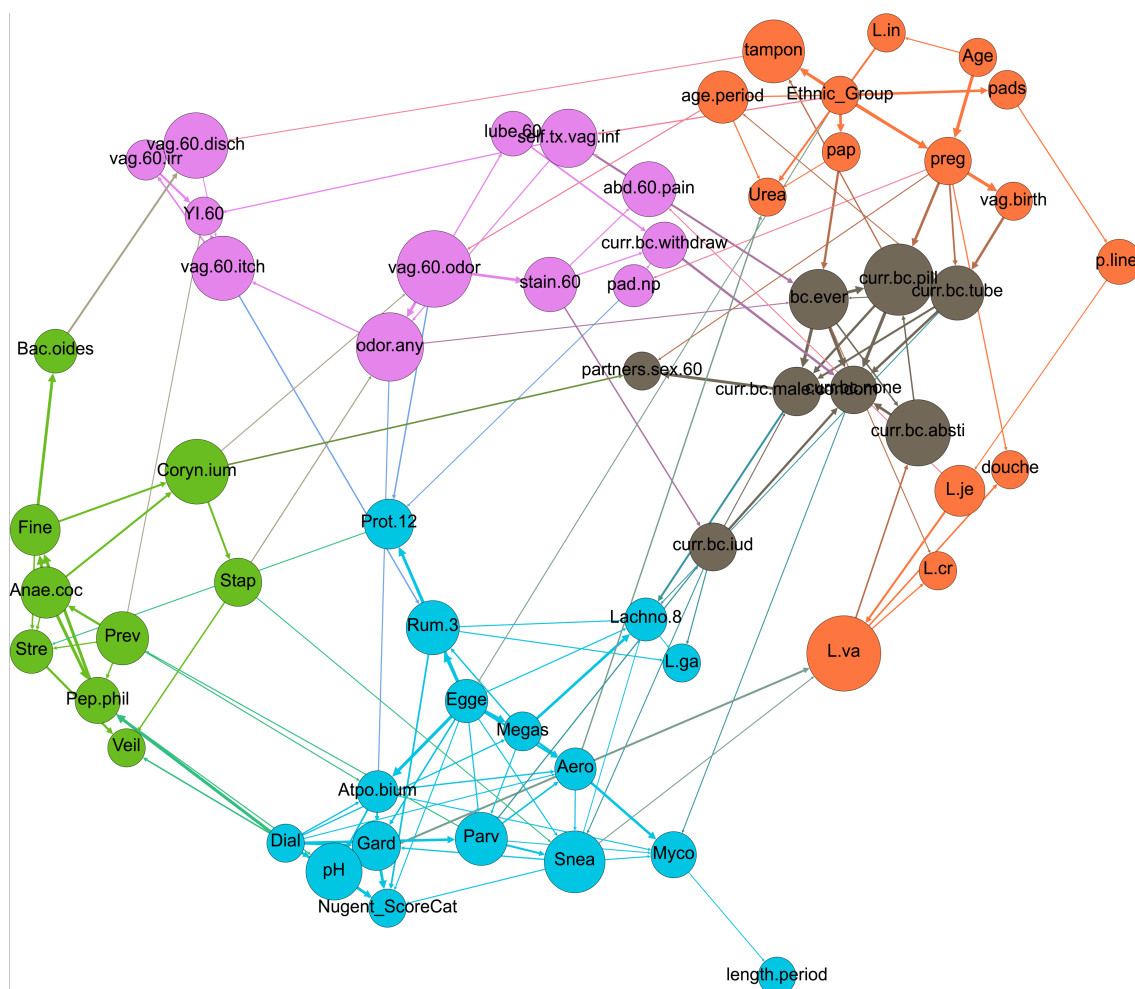



471 **Figure 4: Network depicting modularity-based communities (node colors) as determined by**  
472 **a modularity optimization algorithm (41).** Size of node is proportional to node's betweenness  
473 centrality. Node label abbreviations can be found in S4 File.

#### 474 **Associations between pH, Nugent Score and the microbiome**

475 Several microbial taxa nodes were directly associated with vaginal pH and the Nugent Score.  
476 Vaginal pH is one of the four Amsel criteria used to diagnose BV (32). A vaginal pH of less  
477 than or equal to 4.5 is considered normal, while >4.5 is considered to contribute to BV.  
478 Although all women in this dataset were healthy and did not have clinical BV as determined by  
479 the Amsel criteria, nearly half had an “abnormal” vaginal pH >4.5 (133/285, 46.7%), a finding  
480 which calls into question the use of vaginal pH as an indicator of clinical BV. As with previous  
481 studies (61), NMDS/ANOSIM and PERMANOVA analyses both showed association between  
482 the vaginal microbiome and vaginal pH (Table 1, S5-S7 Files). Using BN analysis, we were able  
483 to reveal that vaginal pH was influenced by 4 bacteria: *Atopobium*, *Dialister*, *Gardnerella* and  
484 *Peptoniphilus* (Fig. 5). These bacteria are all obligate or facultative anaerobes and the presence  
485 of each of these bacteria in the vaginal microbiome increased the likelihood of a vaginal pH >  
486 4.5. These four bacteria have been described as key members of a vaginal microbiome  
487 community type characterized by a diversity of non-*Lactobacilli* bacteria that is found more  
488 commonly in women with a high vaginal pH. It has been hypothesized that the higher vaginal pH  
489 in such women is due to a comparatively low number of lactic acid producing bacteria (8), and  
490 the results of this study support this hypothesis. As with previous research, however, the  
491 presence of these bacteria and the subsequent increase in vaginal pH were reported in healthy  
492 women without clinical BV.

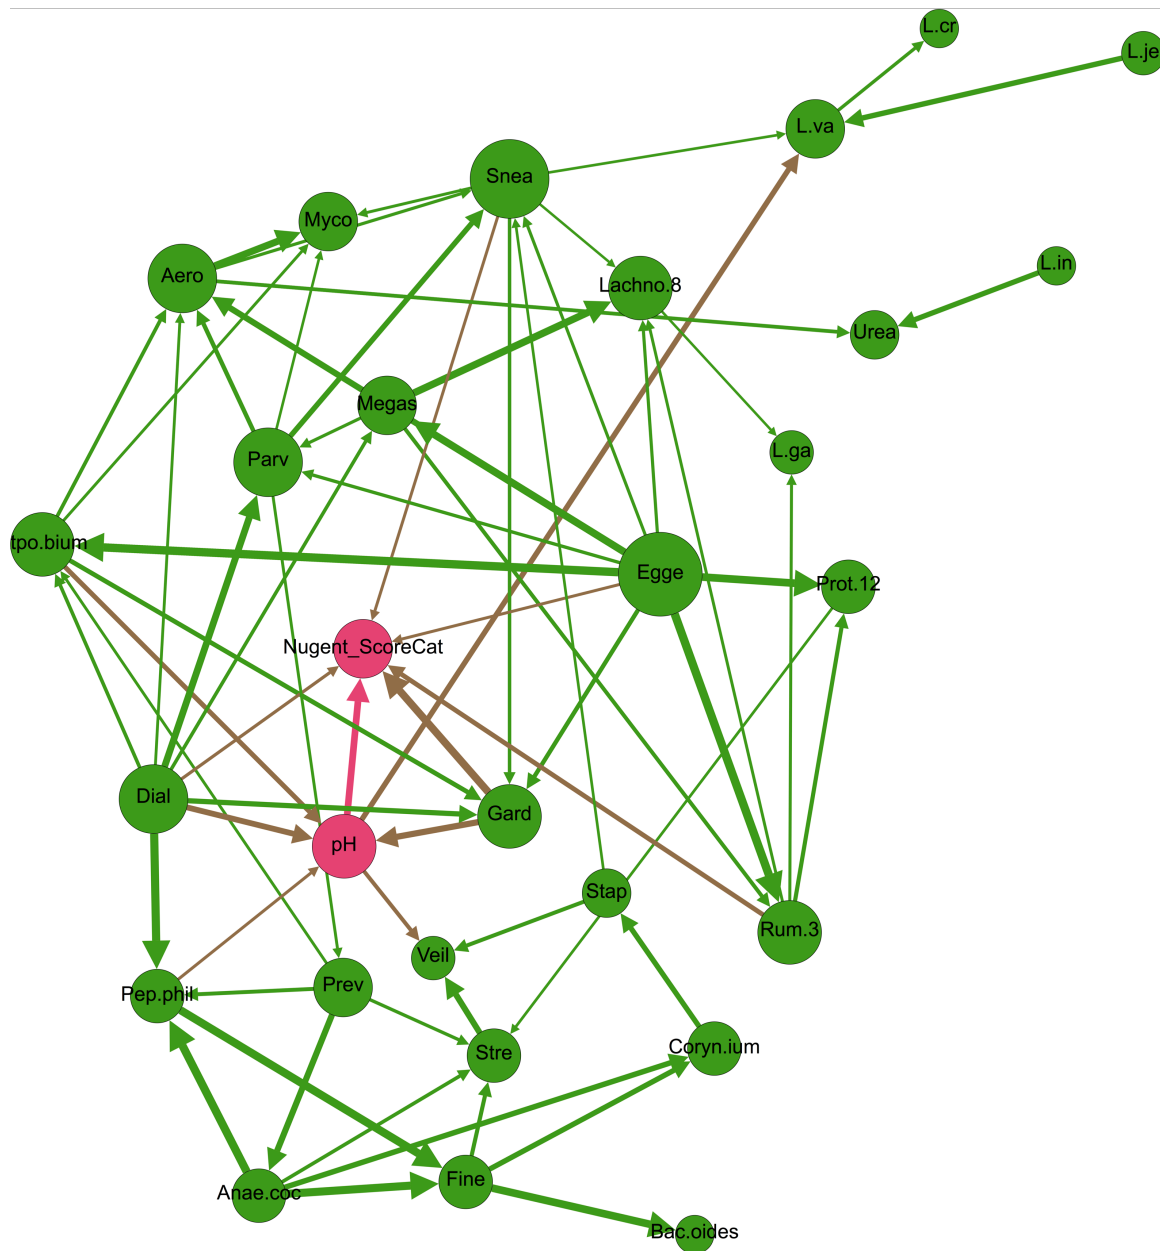

493

Figure

494 **5. Network depicting vaginal pH and Nugent Score (pink), and bacteria (green). Size of**

495 circle is proportional to degree (i.e., number of incoming and outgoing edges), and edge

496 thickness is proportional to bootstrap support. Node label abbreviations can be found in S4 File.

497 The Nugent score is a diagnostic test used primarily in research studies of BV (13). It is rarely  
498 used in practice because it involves time-consuming microscopic examination of bacterial  
499 morphology from vaginal swabs. The Nugent score is based on the relative presence of Gram-  
500 positive versus Gram-negative straight and curved rods, and therefore it is unsurprising that  
501 NMDS/ANOSIM and PERMANOVA testing both uncovered associations between the vaginal  
502 microbiome and the Nugent score (Table 1, S5-S7 Files). Using BN analysis, we were able to  
503 assess this association more closely in order to uncover which specific microbiome members  
504 were driving differences in the Nugent score. We found that the Nugent score for the 285  
505 women in this dataset was influenced by bacteria from two Gram-positive bacteria (*Eggerthella*  
506 and *Ruminococcaceae*), two Gram-negative bacteria (*Dialister* and *Sneathia*) and one Gram-  
507 variable bacterium (*Gardnerella*) group. Vaginal pH was also connected to Nugent score;  
508 women with a pH of >4.5 were much more likely to have a high Nugent score, a finding  
509 consistent with previous literature (8,62). Amongst the 64 combinations of parent variable states  
510 that directly influenced the Nugent Score, there were 6 combinations that conferred 100%  
511 conditional probability of a high Nugent score; all 6 combinations included *Dialister*,  
512 *Ruminococcaceae* and *Sneathia*, which have been found in higher abundance in women with a  
513 high Nugent score (8, Fig. 6). Overall, these results confirm previous findings concerning the  
514 robust association between certain vaginal microbiome members and vaginal pH and Nugent  
515 score. However, the women in this study were BV-negative, and therefore the presence of high  
516 vaginal pH, a high Nugent score and/or microbes associated with these indicators does not  
517 always correlate with clinical BV (8). It is worth noting that the *Lactobacillus* species and the  
518 Nugent Score were only conditionally independent given the presence of vaginal pH and  
519 *Sneathia*—which were directly associated with *L. vaginalis* and indirectly with both *L. jensenii*

520 and *L. crispatus*—and *Ruminococcaceae*, which shared a direct edge with *L. gasseri*. This  
521 indicates a weaker association between the Nugent Score and the *Lactobacilli*, which was  
522 masked by the presence of stronger associations, e.g., with vaginal pH. Removing some of these  
523 directly-linked nodes from the network resulted in a direct association of the Nugent score with  
524 some *Lactobacillus* nodes (data not shown).

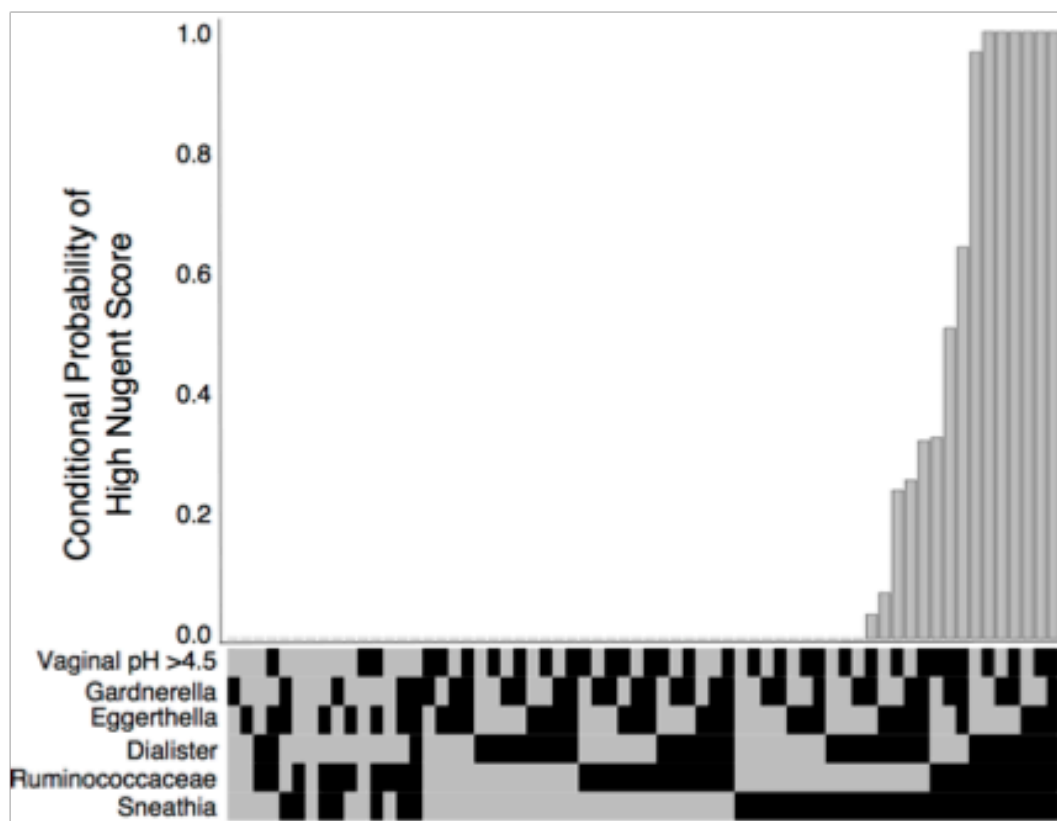

525 **Figure 6. Conditional probability of a high Nugent Score (y-axis) for all possible**  
526 **combinations of direct parent variables (x-axis) (binary heatmap, black = present, gray =**  
527 **absent).**

529 **Associations between the microbiome and risk symptoms other than**  
530 **vaginal pH**

531 While the women in this study did not have clinical BV, 108 of them did report experiencing at  
532 least one risk symptom associated with BV within the 60 days prior to sample collection  
533 (108/285, 38.9%). Vaginal yeast infections were reported by 19 of the 285 respondents during  
534 the same time period. Most risk symptoms clustered together within the BN, with edges  
535 connecting vaginal discharge to both vaginal irritation and vaginal itch; a fishy/musty vaginal  
536 odor to staining of the underwear; any vaginal odor to vaginal itch; vaginal itch to vaginal  
537 infection; and vaginal infection to yeast infection specifically. Staining of the underwear was  
538 also directly connected to uro-abdominal pain in the preceding 60 days, which in turn was  
539 connected to self-treatment of a vaginal infection. While the Nugent score and vaginal pH were  
540 not connected to these risk symptoms, there were direct connections with specific microbial taxa.  
541 Presence of *Lactobacillus jensenii* increased the likelihood of a woman reporting uro-abdominal  
542 pain within the preceding 60 days, from a probability of 3.6% to 10.1% conditional on absence  
543 or presence of *L. jensenii*, respectively. Interestingly, PERMANOVA analysis showed an  
544 association between underwear staining in the previous 60 days and the vaginal microbiome  
545 (Table 1); the results of BN analysis suggest that uro-abdominal pain and *L. jensenii* may be the  
546 specific factors that link underwear staining and the microbiome. Use of pantyliners during  
547 menstruation was also associated with *L. jensenii*, with the conditional probability of *L. jensenii*  
548 being present in the vaginal microbiome increasing from 37.4% to 60.7% with use of panty  
549 liners during menstruation. While the directionality of this relationship is not immediately  
550 intuitive, previous work has shown that use of emollient pads changes the vaginal epithelium and  
551 that some women's vaginal microflora does shift with pad versus tampon use (63,64), although  
552 the evidence on this is mixed (65). NMDS/ANOSIM testing indicated that tampon use was  
553 associated with the vaginal microbiome, lending further support to the hypothesis that menstrual

554 habits could impact the microbiome (S5 and S6 Files). Alternatively, the support for edge  
555 directionality in the Bayesian network was based on majority rule and therefore directionality of  
556 arcs could potentially be reversed; in such a scenario, presence of *L. jensenii* could increase the  
557 likelihood of uro-abdominal pain, and thus underwear staining and pantyliner use. Furthermore,  
558 ethnicity was a potential confounder in the relationship between the microbiome and menstrual  
559 habits, as the network showed an influence of ethnicity on pad versus tampon use, which in turn  
560 directly affected pantyliner use (Fig. 4). The relationships between uro-abdominal pain,  
561 underwear staining, pantyliner use and *L. jensenii* deserve closer study given the importance of  
562 this microbe in vaginal health.

563 Other connections between bacteria and risk symptoms of itch, irritation, odor, staining, pain or  
564 yeast infection included use of a pad outside of menstruation increasing the conditional  
565 likelihood of a woman harboring *Proteobacteria* from 2.8% to 6.7%, as extra-menstrual pad use  
566 could be considered a proxy for vaginal discharge, staining or odor. Because *Proteobacteria* is  
567 such a diverse phylum that includes pathogens and non-pathogens, it is difficult to formulate  
568 hypotheses concerning these relationships. *Corynebacterium* seemed to play an important role in  
569 symptomology and sexual behaviors, as it was directly connected to vaginal odor and number of  
570 sexual partners in the 60 days preceding the survey. Women with this bacterium in their vaginal  
571 flora were more likely to have reported both no or multiple sexual partners, and were less likely  
572 to have reported a single sexual partner, while presence of *Corynebacterium* increased the risk of  
573 vaginal odor in the 60 days preceding the survey. The association of *Corynebacterium* with  
574 vaginal pathology is not widely described in the literature, although it has been recognized as an  
575 important vaginal community member for several decades (66). More recently, studies indicate  
576 that this bacterium is more prevalent in women with spinal cord injuries, women with treatment-

577 refractory BV, and women with urgency urinary incontinence (67–69). Depending on the  
578 species, *Corynebacterium* can be fermentative, and many species produce amino acids, which  
579 can alter pH and the metabolite profile of the surrounding environment, thus providing a  
580 potential mechanism of *Corynebacterium*'s role in vaginal odor and pathology. These  
581 associations were not and would not have been easily observed using NMDS/ANOSIM and  
582 PERMANOVA.

583 Presence of *Bacteroides* had a protective effect against vaginal discharge; the probability of  
584 reporting discharge given the presence of *Bacteroides* was 2.0%, compared to 28.9% given  
585 absence of these bacteria within the vaginal microbiome. This runs counter to current notions  
586 about *Bacteroides*, an anerobic bacteria which is considered a commensal of the gastrointestinal  
587 tract and has been implicated in BV (70,71). However, not all vaginal discharge should be  
588 considered abnormal (72,73), and therefore it would not be a contradiction for *Bacteroides* to be  
589 associated with a decreased prevalence of “healthy” vaginal discharge (such as cervical mucous  
590 released during ovulation) and an increased prevalence of clinical BV. Distinctions such as these  
591 will become increasingly important as the scientific community attempts to attain a more  
592 nuanced understanding of connections between the microbiome and true clinical disease.

## 593 **Microbiome-Behavior Connections**

594 Sexual behavior, sanitary practices and microbiome composition have all been associated with  
595 BV as separate factors. However, little is known about how a woman's sexual and sanitary  
596 habits may influence the microbiome, or vice versa; and how this interplay may influence the  
597 likelihood of developing BV. The network resulting from this dataset showed several direct  
598 connections between the study participants' habits and the microbiome. Whether or not women

599 had ever had a pap smear was directly related to presence/absence of *Ureaplasma*. Women who  
600 reported having had a pap demonstrated a 34.1% likelihood of harboring *Ureaplasma*, compared  
601 to 18.0% among women who had never had a pap smear. Having had a Pap test was the only  
602 healthcare access question included in the Bayesian network that could be considered a proxy for  
603 socioeconomic status (48).

## 604 **Microbiome-Birth Control Interactions**

605 Use of certain types of birth control could influence the microbiome by modulating hormone  
606 levels or by introducing chemical or physical barriers into the vaginal environment. Use of an  
607 intrauterine device (IUD) directly influenced the presence/absence of two different bacteria,  
608 namely *Lactobacillus gasseri* and *Sneathia*; in both cases, use of an IUD decreased the  
609 likelihood of finding the bacterium within the vaginal microbiome. Previous research on the  
610 effects of IUD use on vaginal microflora has been mixed, with both copper and hormone IUDs  
611 associated with higher levels of *Candida* fungi (74) but no associations with any bacterial  
612 alterations (74–76). Given the location of IUD use as a relatively highly-connected intercategory  
613 node in the Bayesian network, as well as its potential association with nonspecific vaginitis and  
614 recurrent BV (32,38,68), the associations with *L. gasseri* and *Sneathia* warrant follow-up study.

615 Women who reported ever using any form of birth control were more likely to have  
616 *Lactobacillus crispatus* within their microbiome compared to women who had never used birth  
617 control (conditional probability of 56.6% versus 48.1%, respectively). Women who reported  
618 male condom use in the 60 days preceding the survey were less likely to harbor *Lachnospiraceae*  
619 than women who did not (conditional probability of 1.3% versus 9.9%). Interestingly,  
620 PERMANOVA testing also showed a connection between male condom use in the previous 60



621 days and the overall composition of the vaginal microbiome (Table 1); the BN analysis allowed  
622 us to pinpoint this relationship to *Lachnospiraceae* specifically. As with other associations, there  
623 were some directed edges that did not immediately fit the paradigm for host-microbe  
624 interactions. For example, IUD use and abstinence were influenced by status of *Parvimonas* and  
625 *L. vaginalis* within the vagina, respectively. It is difficult to hypothesize a mechanism by which  
626 vaginal bacteria could influence a woman's birth control decisions, even though recent studies  
627 have challenged the paradigm that host-microbiome interactions are largely uni-directional by  
628 suggesting that microbiome composition can directly influence host behavior (77–79). This  
629 highlights the importance of remembering that the directionality of edges in the BN are not  
630 definitive.

## 631 **Microbiome-Microbiome Interactions**

632 Within the entire network, bacterial nodes fell largely within 2 modularity-based groupings,  
633 with some exceptions (Fig. 4). Upon isolation of bacterial nodes in a separate graph and  
634 subsequent modularity optimization, four communities of bacteria became evident (Fig. 7).  
635 These groupings did not seem to segregate by either Gram stain, cellular metabolism, or any  
636 other known characteristics. These groupings could be driven by as-yet undiscovered microbial  
637 relationships within the vaginal environment and/or by unmeasured, non-microbiome factors in  
638 this dataset.

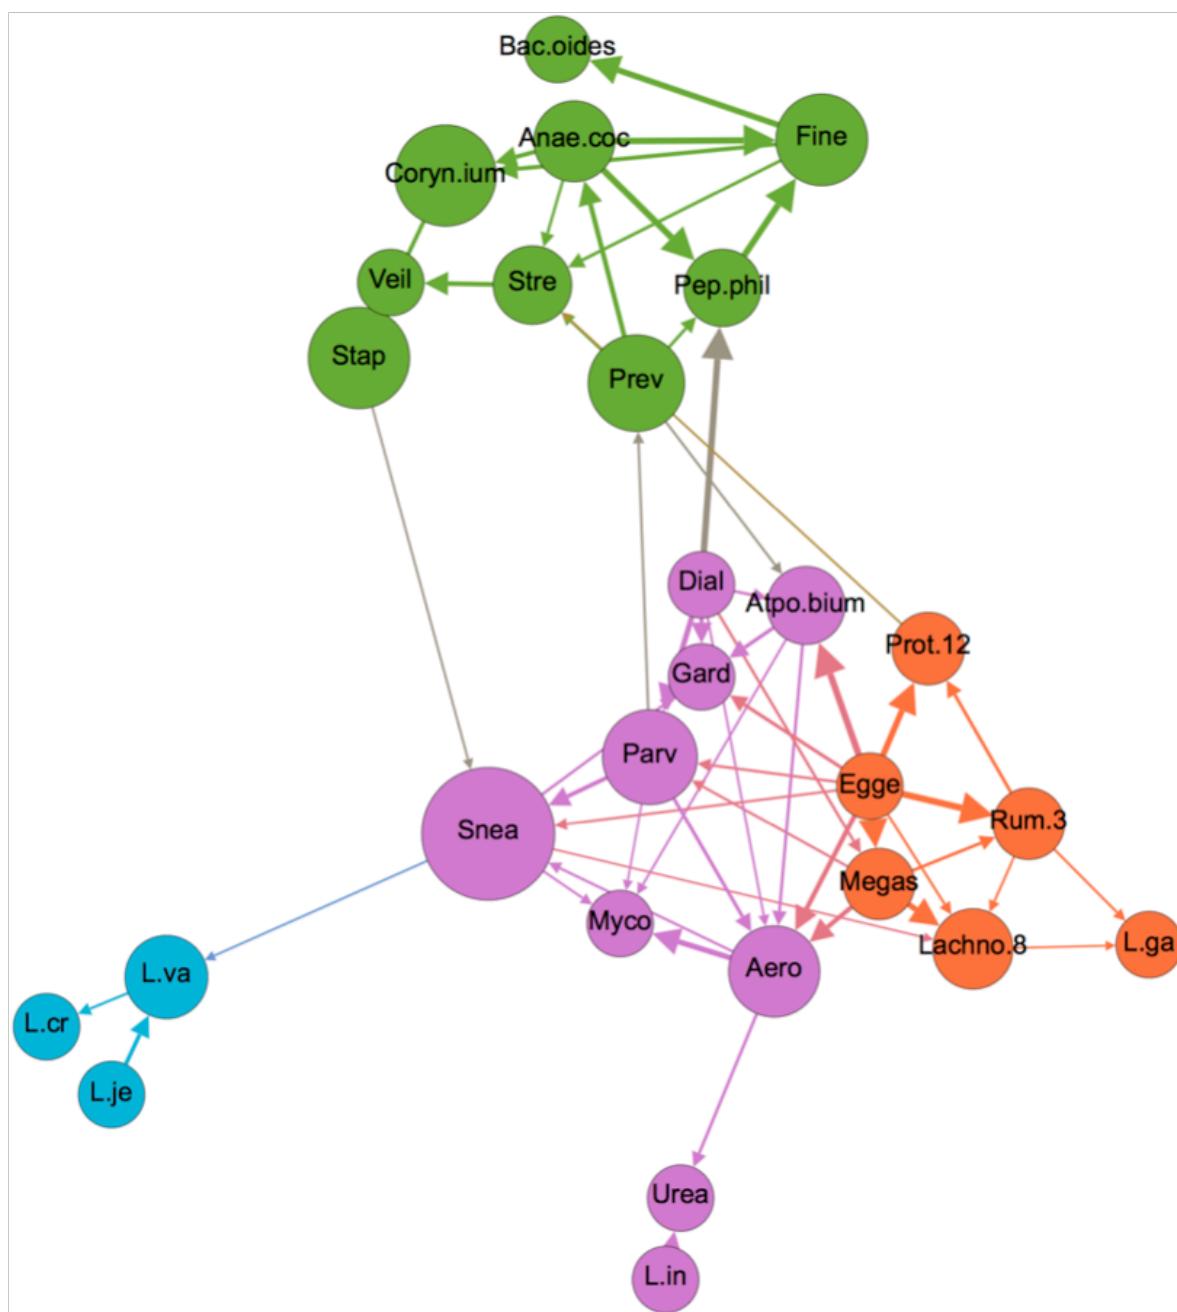

639  
640 **Figure 7. Network depicting only microbiome nodes, colored by modularity-based**  
641 **community type, as determined using a modularity optimizing algorithm (41). Node size is**  
642 **proportional to betweenness centrality, and edge thickness is proportional to bootstrap support.**  
643 Node label abbreviations can be found in S4 File.

644 With the exception of *L. iners* and *L. gasseri*, the *Lactobacilli* formed a tight cluster to  
645 themselves. The fact that *L. iners* segregated separately from the other *Lactobacilli* is interesting  
646 given that this organism differs substantially in terms of genomic and metabolic characteristics,  
647 and its role in vaginal health has been debated despite its very high prevalence (47,80). One clue  
648 in this debate could be the tight association between *L. iners* and *Ureaplasma*, the latter of which  
649 has been implicated in several female reproductive conditions including chorioamnionitis leading  
650 to premature delivery and pelvic inflammatory disease (81,82). Presence of *L. iners* increased the  
651 likelihood of *Ureaplasma* from 19.4% to 36.3%, a significant increase that could have health  
652 implications and therefore deserves follow-up study.

653

## 654 **Conclusions**

655 Using widely accessible software, we have demonstrated the utility of applying a Bayesian  
656 Network approach to a multi-dimensional microbiome dataset. Using this approach, we have  
657 demonstrated associations between women's sexual and menstrual habits, demographics, vaginal  
658 microbiome composition and symptoms and diagnostics of BV. Many of these associations  
659 suggested intriguing relationships, indicating that the BN approach is able to highlight important  
660 associations within complex datasets, which can then be used for hypothesis generation. While  
661 follow-up studies are needed to investigate the significance of these novel associations, the  
662 validity of the associations was buttressed by the presence of many well-documented and self-  
663 evident connections within the overall BN. For instance, our BN confirmed the importance of  
664 vaginal pH and *Gardnerella* as influencers on the Nugent Score (Fig. 4). In addition, we found a

665 very strong association between previous pregnancy, vaginal birth and tubal ligation. Indeed, all  
666 17 participants who reported tubal ligation had previously been pregnant. The most recent data  
667 available suggest that nearly half of tubal ligations were performed in the postpartum period and  
668 that younger women were more likely to have tubal ligation performed post-partum (83). As  
669 with the BN produced here, this suggests a tight association between tubal ligation and previous  
670 pregnancy. Another confirmatory association showed that women who reported vaginal itch in  
671 the 60 days preceding the survey were much more likely to also have reported a yeast infection  
672 in the same time period. Vaginal itch has been closely associated with vulvovaginitis candidiasis  
673 (yeast infection) (84). While relationships such as these do not provide novel insight, they can be  
674 used as a “sanity check” in order to gain confidence in the structure of the BN to then move on to  
675 analysis of less well-understood network connections.

676 An advantage of the BN approach to datasets such as the one presented here is that BN  
677 algorithms are now easily accessible through well-documented and well-supported packages  
678 such as bnlearn (29), which has been integrated with the packages “parallel” (which is included  
679 in R-core) and “snow” (85) to support multi-threading for construction of large networks, and  
680 which now supports both categorical and continuous variables. Numerous GUI-based packages  
681 exist to support network visualization once the BN has been constructed (42,86), allowing for  
682 interactive graph exploration in an intuitive interface. Given the increasing use of multi-level,  
683 multivariate microbiome datasets, this accessibility should pave the way for more scientists to  
684 implement the BN analysis for such data. The need for such an approach has been demonstrated  
685 in the complexity of the relationships that we found within and between the vaginal microbiome,  
686 women’s sexual and menstrual habits, demographics and symptoms/diagnostics. While non-  
687 network approaches such as PERMANOVA and ordination/clustering can be used to uncover

688 associations between individual metadata variables and the microbiome as a whole (as we  
689 demonstrate in this work), there are important limitations to these methods: first, these methods  
690 collapse the microbiome data into a single datapoint projected into two or a maximum of three  
691 dimensions, and therefore preclude assessment of intra-microbiome interactions, as well as  
692 interactions between metadata variables and specific microbiome members; second, these  
693 methods usually approach statistical testing on a variable-by-variable basis, and are thus ill-  
694 suited to understanding complex interactions between subsets of variables and the microbiome;  
695 and third, these approaches fail to show intra-metadata interactions within an analysis. BN  
696 analysis overcomes these limitations by testing for all possible associations between every node  
697 within the data – thus uncovering complex interactions within hierarchical, multidimensional  
698 datasets. Such datasets increasingly typify microbiome studies, and the need for rich and  
699 standardized metadata to support microbiome studies has been recently noted and implemented  
700 (87,88); such initiatives would be well-complemented by the data-flexible and intuitive nature of  
701 BN's. It is important to note, however, that the incorporation of more metadata variables (nodes)  
702 into BN analyses will necessitate larger sample sizes in order to support BN construction and  
703 inference. Similarly, the data distributions currently accommodated by available BN analysis  
704 packages for continuous variables are limited to the Normal (Gaussian) distribution. This  
705 constraint results in the need to discretize most microbiome data, which are commonly  
706 characterized by zero-inflated, skewed counts that do not conform to a Gaussian distribution. As  
707 was the case in this report, the need to dichotomize may cause loss of information, resulting in  
708 less-than-optimally refined inference. Fortunately, BN analysis methods form an active area of  
709 research, and extensions to accommodate distributions other than the Gaussian are currently

710 being developed (89). As these efforts evolve, the BN approach is likely to become more  
711 flexible, and thus even better-suited to the unique characteristics of microbiome datasets.

## 712 **Acknowledgements**

713 We would like to thank the editor and three anonymous reviewers for there useful comments.

## 714 **References**

- 715 1. Donders GG, Bosmans E, Dekeersmaecker A, Vereecken A, Van Bulck B, Spitz B.  
716 Pathogenesis of abnormal vaginal bacterial flora. *Am J Obstet Gynecol.* 2000  
717 Apr;182(4):872–8.
- 718 2. Pybus V, Onderdonk AB. Microbial interactions in the vaginal ecosystem, with  
719 emphasis on the pathogenesis of bacterial vaginosis. *Microbes Infect Inst Pasteur.*  
720 1999 Apr;1(4):285–92.
- 721 3. Martin HL, Richardson BA, Nyange PM, Lavreys L, Hillier SL, Chohan B, et al. Vaginal  
722 lactobacilli, microbial flora, and risk of human immunodeficiency virus type 1 and  
723 sexually transmitted disease acquisition. *J Infect Dis.* 1999 Dec;180(6):1863–8.
- 724 4. Allsworth JE, Peipert JF. Prevalence of bacterial vaginosis: 2001-2004 National Health  
725 and Nutrition Examination Survey data. *Obstet Gynecol.* 2007 Jan;109(1):114–20.
- 726 5. Zhou X, Brotman RM, Gajer P, Abdo Z, Schüette U, Ma S, et al. Recent advances in  
727 understanding the microbiology of the female reproductive tract and the causes of  
728 premature birth. *Infect Dis Obstet Gynecol.* 2010;2010:737425.
- 729 6. Bautista CT, Wurapa E, Sateren WB, Morris S, Hollingsworth B, Sanchez JL. Bacterial  
730 vaginosis: a synthesis of the literature on etiology, prevalence, risk factors, and  
731 relationship with chlamydia and gonorrhea infections. *Mil Med Res.* 2016;3:4.
- 732 7. Eschenbach DA, Davick PR, Williams BL, Klebanoff SJ, Young-Smith K, Critchlow CM, et  
733 al. Prevalence of hydrogen peroxide-producing *Lactobacillus* species in normal  
734 women and women with bacterial vaginosis. *J Clin Microbiol.* 1989 Feb;27(2):251–6.
- 735 8. Ravel J, Gajer P, Abdo Z, Schneider GM, Koenig SSK, McCulle SL, et al. Vaginal  
736 microbiome of reproductive-age women. *Proc Natl Acad Sci.* 2011 Mar  
737 15;108(Supplement 1):4680–7.

- 738 9. Fredricks DN, Fiedler TL, Marrazzo JM. Molecular Identification of Bacteria Associated  
739 with Bacterial Vaginosis. *N Engl J Med*. 2005 Nov 3;353(18):1899–911.
- 740 10. Ferris MJ, Norori J, Zozaya-Hinchliffe M, Martin DH. Cultivation-Independent Analysis  
741 of Changes in Bacterial Vaginosis Flora Following Metronidazole Treatment. *J Clin*  
742 *Microbiol*. 2007 Mar;45(3):1016–8.
- 743 11. Lamont RF, Sobel JD, Akins RA, Hassan SS, Chaiworapongsa T, Kusanovic JP, et al. The  
744 vaginal microbiome: new information about genital tract flora using molecular based  
745 techniques. *BJOG Int J Obstet Gynaecol*. 2011 Apr;118(5):533–49.
- 746 12. Livengood CH. Bacterial Vaginosis: An Overview for 2009. *Rev Obstet Gynecol*.  
747 2009;2(1):28–37.
- 748 13. Nugent RP, Krohn MA, Hillier SL. Reliability of diagnosing bacterial vaginosis is  
749 improved by a standardized method of gram stain interpretation. *J Clin Microbiol*.  
750 1991 Feb;29(2):297–301.
- 751 14. Ma B, Forney LJ, Ravel J. The vaginal microbiome: rethinking health and diseases.  
752 *Annu Rev Microbiol*. 2012;66:371–89.
- 753 15. Beigi RH, Wiesenfeld HC, Hillier SL, Straw T, Krohn MA. Factors associated with  
754 absence of H<sub>2</sub>O<sub>2</sub>-producing *Lactobacillus* among women with bacterial vaginosis. *J*  
755 *Infect Dis*. 2005 Mar 15;191(6):924–9.
- 756 16. Brotman RM, Klebanoff MA, Nansel TR, Andrews WW, Schwebke JR, Zhang J, et al. A  
757 Longitudinal Study of Vaginal Douching and Bacterial Vaginosis—A Marginal  
758 Structural Modeling Analysis. *Am J Epidemiol*. 2008 Jul 15;168(2):188–96.
- 759 17. Hellberg D, Nilsson S, Mårdh PA. Bacterial vaginosis and smoking. *Int J STD AIDS*. 2000  
760 Sep;11(9):603–6.
- 761 18. Hay PE, Ugwumadu A, Chowns J. Sex, thrush and bacterial vaginosis. *Int J STD AIDS*.  
762 1997 Oct;8(10):603–8.
- 763 19. Ness RB, Hillier S, Richter HE, Soper DE, Stamm C, Bass DC, et al. Can known risk  
764 factors explain racial differences in the occurrence of bacterial vaginosis? *J Natl Med*  
765 *Assoc*. 2003 Mar;95(3):201–12.
- 766 20. Zhou X, Hansmann MA, Davis CC, Suzuki H, Brown CJ, Schütte U, et al. The vaginal  
767 bacterial communities of Japanese women resemble those of women in other racial  
768 groups. *FEMS Immunol Med Microbiol*. 2010 Mar;58(2):169–81.
- 769 21. Warton DI, Wright ST, Wang Y. Distance-based multivariate analyses confound  
770 location and dispersion effects. *Methods Ecol Evol*. 2012 Feb 1;3(1):89–101.

- 771 22. Gloor GB, Reid G. Compositional analysis: a valid approach to analyze microbiome  
772 high-throughput sequencing data. *Can J Microbiol*. 2016 Apr 12;62(8):692–703.
- 773 23. Xia Y, Sun J. Hypothesis testing and statistical analysis of microbiome. *Genes Dis*  
774 [Internet]. 2017 Jun 23 [cited 2017 Aug 27]; Available from:  
775 <http://www.sciencedirect.com/science/article/pii/S2352304217300351>
- 776 24. Shankar J. Insights into study design and statistical analyses in translational  
777 microbiome studies. *Ann Transl Med* [Internet]. 2017 Jun [cited 2017 Aug 27];5(12).  
778 Available from: <http://www.ncbi.nlm.nih.gov/pmc/articles/PMC5497086/>
- 779 25. Ramoni RB, Himes BE, Sale MM, Furie KL, Ramoni MF. Predictive Genomics of  
780 Cardioembolic Stroke. *Stroke J Cereb Circ*. 2009 Mar;40(3 Suppl):S67–70.
- 781 26. Gevaert O, Smet FD, Timmerman D, Moreau Y, Moor BD. Predicting the prognosis of  
782 breast cancer by integrating clinical and microarray data with Bayesian networks.  
783 *Bioinformatics*. 2006 Jul 15;22(14):e184–90.
- 784 27. Cruz-Ramírez N, Acosta-Mesa HG, Carrillo-Calvet H, Nava-Fernández LA, Barrientos-  
785 Martínez RE. Diagnosis of breast cancer using Bayesian networks: a case study.  
786 *Comput Biol Med*. 2007 Nov;37(11):1553–64.
- 787 28. Gámez JA, Mateo JL, Puerta JM. Learning Bayesian networks by hill climbing: efficient  
788 methods based on progressive restriction of the neighborhood. *Data Min Knowl*  
789 *Discov*. 2010 May 11;22(1-2):106–48.
- 790 29. Scutari M. Learning Bayesian Networks with the bnlearn R Package. *J Stat Softw*.  
791 2010;35(3):1–22.
- 792 30. Højsgaard S. Graphical Independence Networks with the gRain Package for R. *J Stat*  
793 *Softw*. 2012;46(10):1–26.
- 794 31. Uusitalo L. Advantages and challenges of Bayesian networks in environmental  
795 modelling. *Ecol Model*. 2007 May 10;203(3–4):312–8.
- 796 32. Amsel R, Totten PA, Spiegel CA, Chen KC, Eschenbach D, Holmes KK. Nonspecific  
797 vaginitis. Diagnostic criteria and microbial and epidemiologic associations. *Am J Med*.  
798 1983 Jan;74(1):14–22.
- 799 33. Gajer P, Brotman RM, Bai G, Sakamoto J, Schütte UME, Zhong X, et al. Temporal  
800 Dynamics of the Human Vaginal Microbiota. *Sci Transl Med*. 2012 May  
801 2;4(132):132ra52–132ra52.
- 802 34. Anderson MJ. A new method for non - parametric multivariate analysis of variance.  
803 *Austral Ecol*. 2001 Feb 1;26(1):32–46.



- 804 35. Paulson JN, Stine OC, Bravo HC, Pop M. Differential abundance analysis for microbial  
805 marker-gene surveys. *Nat Methods*. 2013 Dec;10(12):1200–2.
- 806 36. Wang Q, Garrity GM, Tiedje JM, Cole JR. Naïve Bayesian Classifier for Rapid Assignment  
807 of rRNA Sequences into the New Bacterial Taxonomy. *Appl Environ Microbiol*. 2007  
808 Aug 15;73(16):5261–7.
- 809 37. R Core Team. R: A language and environment for statistical computing [Internet].  
810 Vienna, Austria: R Foundation for Statistical Computing; 2016. Available from:  
811 <https://www.R-project.org/>
- 812 38. Li X-D, Wang C-C, Zhang X-J, Gao G-P, Tong F, Li X, et al. Risk factors for bacterial  
813 vaginosis: results from a cross-sectional study having a sample of 53,652 women. *Eur J*  
814 *Clin Microbiol Infect Dis Off Publ Eur Soc Clin Microbiol*. 2014 Sep;33(9):1525–32.
- 815 39. Steck H. Learning the Bayesian Network Structure: Dirichlet Prior versus Data. *Proc*  
816 *24th Conf Uncertain Artif Intell*. 2008;511–8.
- 817 40. Nwankwo TO, Aniebue UU, Umeh UA. Syndromic Diagnosis in Evaluation of Women  
818 with Symptoms of Vaginitis. *Curr Infect Dis Rep*. 2017 Jan 1;19(1):3.
- 819 41. Blondel VD, Guillaume J-L, Lambiotte R, Lefebvre E. Fast unfolding of communities in  
820 large networks. *J Stat Mech Theory Exp*. 2008 Oct 9;2008(10):P10008.
- 821 42. Bastian M, Heymann S, Jacomy M. Gephi: An Open Source Software for Exploring and  
822 Manipulating Networks. In San Jose, California, USA; 2009.
- 823 43. Legendre P, Gallagher ED. Ecologically meaningful transformations for ordination of  
824 species data. *Oecologia*. 2001 Oct;129(2):271–80.
- 825 44. Oksanen J, Blanchet FG, Kindt R, Legendre P, Minchin PR, O’Hara RB, et al. vegan:  
826 Community Ecology Package [Internet]. 2014. Available from: [http://CRAN.R-](http://CRAN.R-project.org/package=vegan)  
827 [project.org/package=vegan](http://CRAN.R-project.org/package=vegan)
- 828 45. Clarke KR. Non-parametric multivariate analyses of changes in community structure.  
829 *Aust J Ecol*. 1993 Mar 1;18(1):117–43.
- 830 46. Gelman A, Hill J. Data analysis using regression and multivariate/hierarchical models.  
831 New York, NY: Cambridge University Press; 2007. 625 p. (Analytical Methods for  
832 Social Research).
- 833 47. Srinivasan S, Hoffman NG, Morgan MT, Matsen FA, Fiedler TL, Hall RW, et al. Bacterial  
834 Communities in Women with Bacterial Vaginosis: High Resolution Phylogenetic  
835 Analyses Reveal Relationships of Microbiota to Clinical Criteria. *PLOS ONE*. 2012 Jun  
836 18;7(6):e37818.

- 837 48. Monnat SM. Race/Ethnicity and the Socioeconomic Status Gradient in Women's Cancer  
838 Screening Utilization: A Case of Diminishing Returns? *J Health Care Poor Underserved*.  
839 2014 Feb;25(1):332–56.
- 840 49. Sauer AG, Jemal A, Simard EP, Fedewa SA. Differential uptake of recent Papanicolaou  
841 testing by HPV vaccination status among young women in the United States, 2008–  
842 2013. *Cancer Epidemiol*. 2015 Aug;39(4):650–5.
- 843 50. Romo LF, Berenson AB. Tampon use in adolescence: differences among European  
844 American, African American and Latina women in practices, concerns, and barriers. *J*  
845 *Pediatr Adolesc Gynecol*. 2012 Oct;25(5):328–33.
- 846 51. Anderson SE, Dallal GE, Must A. Relative weight and race influence average age at  
847 menarche: results from two nationally representative surveys of US girls studied 25  
848 years apart. *Pediatrics*. 2003 Apr;111(4 Pt 1):844–50.
- 849 52. Chumlea WC, Schubert CM, Roche AF, Kulin HE, Lee PA, Himes JH, et al. Age at  
850 menarche and racial comparisons in US girls. *Pediatrics*. 2003 Jan;111(1):110–3.
- 851 53. Nunn KL, Forney LJ. Unraveling the Dynamics of the Human Vaginal Microbiome. *Yale*  
852 *J Biol Med*. 2016 Sep 30;89(3):331–7.
- 853 54. Romero R, Hassan SS, Gajer P, Tarca AL, Fadrosh DW, Nikita L, et al. The composition  
854 and stability of the vaginal microbiota of normal pregnant women is different from  
855 that of non-pregnant women. *Microbiome*. 2014 Feb 3;2(1):4.
- 856 55. Horstman AM, Dillon EL, Urban RJ, Sheffield-Moore M. The Role of Androgens and  
857 Estrogens on Healthy Aging and Longevity. *J Gerontol A Biol Sci Med Sci*. 2012  
858 Nov;67(11):1140–52.
- 859 56. Tibaldi C, Cappello N, Latino MA, Polarolo G, Masuelli G, Cavallo F, et al. Maternal risk  
860 factors for abnormal vaginal flora during pregnancy. *Int J Gynaecol Obstet Off Organ*  
861 *Int Fed Gynaecol Obstet*. 2016 Apr;133(1):89–93.
- 862 57. Carey J, Blackwelder W, Nugent R, Matteson M, Rao A, Eschenbach D, et al. Antepartum  
863 Cultures for *Ureaplasma-Urealyticum* Are Not Useful in Predicting Pregnancy  
864 Outcome. *Am J Obstet Gynecol*. 1991 Mar;164(3):728–33.
- 865 58. Goldenberg RL, Hauth JC, Andrews WW. Intrauterine Infection and Preterm Delivery.  
866 *N Engl J Med*. 2000 May 18;342(20):1500–7.
- 867 59. Freedman DS, Khan LK, Serdula MK, Dietz WH, Srinivasan SR, Berenson GS. Relation of  
868 age at menarche to race, time period, and anthropometric dimensions: the Bogalusa  
869 Heart Study. *Pediatrics*. 2002 Oct;110(4):e43.

- 870 60. Wu T, Mendola P, Buck GM. Ethnic differences in the presence of secondary sex  
871 characteristics and menarche among US girls: the Third National Health and Nutrition  
872 Examination Survey, 1988-1994. *Pediatrics*. 2002 Oct;110(4):752-7.
- 873 61. Ravel J, Gajer P, Abdo Z, Schneider GM, Koenig SSK, McCulle SL, et al. Vaginal  
874 microbiome of reproductive-age women. *Proc Natl Acad Sci*. 2011 Mar  
875 15;108(Supplement 1):4680-7.
- 876 62. Hoffman MK, Bellad MB, Charantimath US, Kavi A, Nagmoti JM, Nagmoti MB, et al. A  
877 Comparison of Colorimetric Assessment of Vaginal pH with Nugent Score for the  
878 Detection of Bacterial Vaginosis. *Infect Dis Obstet Gynecol*. 2017 Feb  
879 15;2017:e1040984.
- 880 63. Farage MA, Miller KW, Azuka CE, Wang B, Lankhof S, Henn D, et al. Skin benefits with a  
881 novel emollient-treated menstrual pad. *Rev Recent Clin Trials*. 2013 Mar;8(1):29-35.
- 882 64. Hickey RJ, Abdo Z, Zhou X, Nemeth K, Hansmann M, Osborn TW, et al. Effects of  
883 tampons and menses on the composition and diversity of vaginal microbial  
884 communities over time. *BJOG Int J Obstet Gynaecol*. 2013 May;120(6):695-704;  
885 discussion 704-6.
- 886 65. Klebanoff MA, Nansel TR, Brotman RM, Zhang J, Yu K-F, Schwebke JR, et al. Personal  
887 hygienic behaviors and bacterial vaginosis. *Sex Transm Dis*. 2010 Feb;37(2):94-9.
- 888 66. McCormack WM, Hayes CH, Rosner B, Evrard JR, Crockett VA, Alpert S, et al. Vaginal  
889 colonization with *Corynebacterium vaginale* (*Haemophilus vaginalis*). *J Infect Dis*.  
890 1977 Dec;136(6):740-5.
- 891 67. Pires CVG, Linhares IM, Serzedello F, Fukazawa EI, Baracat EC, Witkin SS. Alterations  
892 in the Genital Microbiota in Women With Spinal Cord Injury. *Obstet Gynecol*. 2016  
893 Feb;127(2):273-8.
- 894 68. Wang B, Xiao BB, Shang CG, Wang K, Na RS, Nu XX, et al. Molecular analysis of the  
895 relationship between specific vaginal bacteria and bacterial vaginosis metronidazole  
896 therapy failure. *Eur J Clin Microbiol Infect Dis Off Publ Eur Soc Clin Microbiol*. 2014  
897 Oct;33(10):1749-56.
- 898 69. Pearce MM, Hilt EE, Rosenfeld AB, Zilliox MJ, Thomas-White K, Fok C, et al. The female  
899 urinary microbiome: a comparison of women with and without urgency urinary  
900 incontinence. *mBio*. 2014 Jul 8;5(4):e01283-01214.
- 901 70. Verhelst R, Verstraelen H, Claeys G, Verschraegen G, Delanghe J, Van Simaey L, et al.  
902 Cloning of 16S rRNA genes amplified from normal and disturbed vaginal microflora  
903 suggests a strong association between *Atopobium vaginae*, *Gardnerella vaginalis* and  
904 bacterial vaginosis. *BMC Microbiol*. 2004 Apr 21;4:16.

- 905 71. Machado D, Castro J, Palmeira-de-Oliveira A, Martinez-de-Oliveira J, Cerca N. Bacterial  
906 Vaginosis Biofilms: Challenges to Current Therapies and Emerging Solutions. *Front*  
907 *Microbiol* [Internet]. 2016 [cited 2017 Feb 10];6. Available from:  
908 <http://journal.frontiersin.org/article/10.3389/fmicb.2015.01528/abstract>
- 909 72. Zinaman MJ. Using cervical mucus and other easily observed biomarkers to identify  
910 ovulation in prospective pregnancy trials. *Paediatr Perinat Epidemiol*. 2006 Nov;20  
911 Suppl 1:26–9.
- 912 73. Powell AM, Nyirjesy P. New Perspectives on the Normal Vagina and Noninfectious  
913 Causes of Discharge. *Clin Obstet Gynecol*. 2015 Sep;58(3):453–63.
- 914 74. Erol O, Simavli S, Derbent AU, Ayrim A, Kafali H. The impact of copper-containing and  
915 levonorgestrel-releasing intrauterine contraceptives on cervicovaginal cytology and  
916 microbiological flora: a prospective study. *Eur J Contracept Reprod Health Care Off J*  
917 *Eur Soc Contracept*. 2014 Jun;19(3):187–93.
- 918 75. Jacobson JC, Turok DK, Dermish AI, Nygaard IE, Settles ML. Vaginal microbiome  
919 changes with levonorgestrel intrauterine system placement. *Contraception*. 2014  
920 Aug;90(2):130–5.
- 921 76. Donders G, Bellen G, Janssens D, Van Bulck B, Hinoul P, Verguts J. Influence of  
922 contraceptive choice on vaginal bacterial and fungal microflora. *Eur J Clin Microbiol*  
923 *Infect Dis Off Publ Eur Soc Clin Microbiol*. 2017 Jan;36(1):43–8.
- 924 77. Fischer CN, Trautman EP, Crawford JM, Stabb EV, Handelsman J, Broderick NA.  
925 Metabolite exchange between microbiome members produces compounds that  
926 influence *Drosophila* behavior. *eLife*. 2017 09;6.
- 927 78. Bharwani A, Mian MF, Surette MG, Bienenstock J, Forsythe P. Oral treatment with  
928 *Lactobacillus rhamnosus* attenuates behavioural deficits and immune changes in  
929 chronic social stress. *BMC Med*. 2017 Jan 11;15(1):7.
- 930 79. Yang NJ, Chiu IM. Bacterial Signaling to the Nervous System through Toxins and  
931 Metabolites. *J Mol Biol*. 2017 Jan 6;
- 932 80. Petrova MI, Reid G, Vaneechoutte M, Lebeer S. *Lactobacillus iners*: Friend or Foe?  
933 *Trends Microbiol*. 2016 Nov 30;
- 934 81. Sweeney EL, Kallapur SG, Gisslen T, Lambers DS, Chougnet CA, Stephenson S-A, et al.  
935 Placental Infection With *Ureaplasma* species Is Associated With Histologic  
936 Chorioamnionitis and Adverse Outcomes in Moderately Preterm and Late-Preterm  
937 Infants. *J Infect Dis*. 2016 Apr 15;213(8):1340–7.
- 938 82. Haggerty CL, Totten PA, Tang G, Astete SG, Ferris MJ, Norori J, et al. Identification of  
939 novel microbes associated with pelvic inflammatory disease and infertility. *Sex*  
940 *Transm Infect*. 2016 Sep;92(6):441–6.

- 941 83. MacKay AP, Kieki BA, Koonin LM, Beattie K. Tubal Sterilization in the United States,  
942 1994-1996. *Fam Plann Perspect*. 2001;33(4):161-5.
- 943 84. Gondo F, da Silva MG, Polettini J, Tristao A da R, Peracoli JC, Witkin SS, et al. Vaginal  
944 flora alterations and clinical symptoms in low-risk pregnant women. *Gynecol Obstet*  
945 *Invest*. 2011;71(3):158-62.
- 946 85. Tierney L, Rossini A, Li N, Sevcikova H. *Simple Network of Workstations*. 2016.
- 947 86. Shannon P, Markiel A, Ozier O, Baliga NS, Wang JT, Ramage D, et al. Cytoscape: a  
948 software environment for integrated models of biomolecular interaction networks.  
949 *Genome Res*. 2003 Nov;13(11):2498-504.
- 950 87. Nayfach S, Pollard KS. Toward Accurate and Quantitative Comparative Metagenomics.  
951 *Cell*. 2016 Aug 25;166(5):1103-16.
- 952 88. Bernstein MN, Doan A, Dewey CN. MetaSRA: normalized sample-specific metadata for  
953 the Sequence Read Archive. *bioRxiv*. 2016 Nov 30;090506.
- 954 89. Bhadra A, Rao A, Baladandayuthapani V. Inferring network structure in non-normal  
955 and mixed discrete-continuous genomic data. *ArXiv160400376 Stat [Internet]*. 2016  
956 Apr 1 [cited 2017 Sep 29]; Available from: <http://arxiv.org/abs/1604.00376>

957

## 958 **Supporting information**

959 **S1 File. Unfiltered, non-normalized, non-dichotomized microbiome counts and survey**  
960 **responses (upon request)**

961 **S2 File. Survey questions and abbreviations (upon request)**

962 **S3 File. Filtered, discretized microbiome counts and survey responses for all 60 variables**  
963 **used in BN construction and analysis. (upon request)**

964 **S4 File. *A priori* classifications, abbreviations, and BN analysis results (degree, closeness**  
965 **centrality and betweenness centrality) for all 60 variables used in BN construction and**  
966 **analysis. (upon request)**

967 **S5 File. NMDS-ANOSIM testing results. (upon request)**

968 **S6 File. NMDS plots of the six variables found to significantly influence the vaginal**  
969 **microbiome using the ANOSIM test. (upon request)**

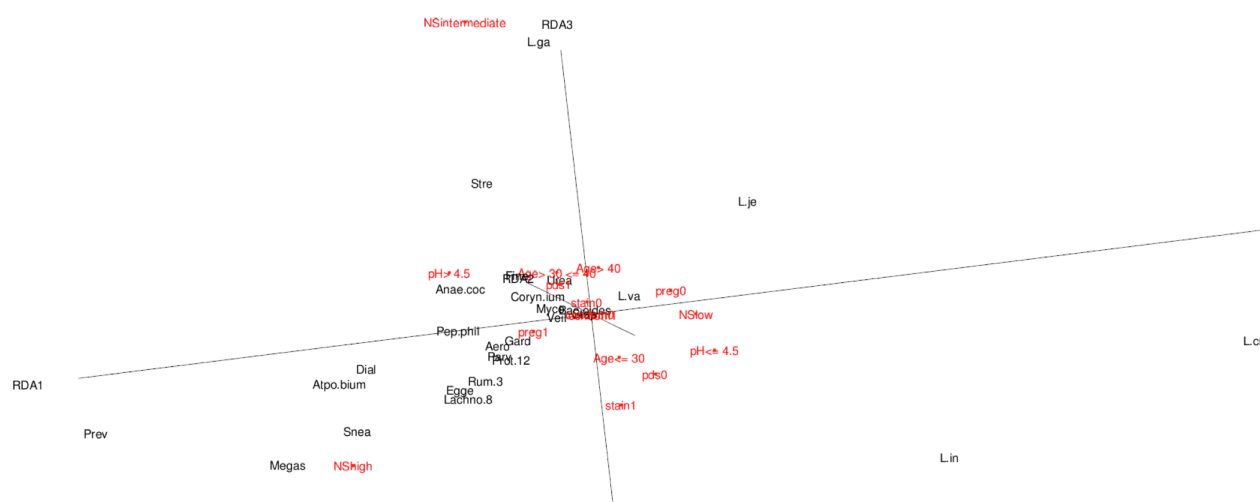

970 **S7 Figure. 3D ordination plot based on PERMANOVA results.**

971 **S8 File. Figures describing the distribution of the abundances of taxa used in BN analysis.**

972 **Table 1. PERMANOVA permutation test results after stepwise model selection using the**  
973 **AIC. PERMANOVA was used to assess the significance of associations between metadata**  
974 **and the vaginal microbiome composition. P-values are based on 1000 permutations.**

| <b>Variable</b>                                            | <b>Degrees of freedom</b> | <b>p-values</b> |
|------------------------------------------------------------|---------------------------|-----------------|
| <b>Nugent score</b>                                        | <b>2</b>                  | <b>0.001</b>    |
| <b>Previous pregnancy</b>                                  | <b>1</b>                  | <b>0.001</b>    |
| <b>Vaginal pH</b>                                          | <b>1</b>                  | <b>0.001</b>    |
| <b>Participant age</b>                                     | <b>2</b>                  | <b>0.012</b>    |
| <b>Use of menstrual pads during menstruation</b>           | <b>1</b>                  | <b>0.023</b>    |
| <b>Staining of underwear in previous 60 days</b>           | <b>1</b>                  | <b>0.027</b>    |
| <b>Use of male condoms as current birth control method</b> | <b>1</b>                  | <b>0.066</b>    |

975
